# Supplementary material for: Free-radical initiated cascade methylation or trideuteromethylation of isocyanides with dimethyl sulfoxides
Source: Royal Society of Chemistry journal article supplement (doi:10.1039/c7ra08484f), 2017-01-01

## Supporting Information

### Free-radical initiated cascade methylation or trideuteromethylation of isocyanides with dimethyl Sulfoxides

Rui Zhang<sup>†a</sup>, Xiaoqian Shi<sup>†a</sup>, Qinqin Yan<sup>a</sup>, Zejiang Li<sup>\*ab</sup>, Zheng Wang<sup>a</sup>, Haifei Yu<sup>a</sup>, Xiaoke

Wang<sup>a</sup>, Jing Qi<sup>\*a</sup>, menglu Jiang<sup>a</sup>

<sup>a</sup>College of Chemistry & Environmental Science, Hebei University, Baoding, Hebei; <sup>b</sup>Key Laboratory of Medicinal Chemistry and Molecular Diagnosis of Ministry of Education, Baoding, Hebei, 071002, P. R. China

E-mail: lizejiang898@126.com; qijing634@126.com

|                                                              |       |
|--------------------------------------------------------------|-------|
| General Information.....                                     | 1     |
| Typical procedure.....                                       | 1     |
| The modification of the methylation reaction condition.....  | 2     |
| Physical data and references for the following products..... | 3-14  |
| Copies of the <sup>1</sup> H NMR, <sup>13</sup> C NMR.....   | 15-39 |

#### General Information

<sup>1</sup>H and <sup>13</sup>C NMR spectra were recorded on a Bruker advance III 600 spectrometer in CDCl<sub>3</sub> with TMS as internal standard. Mass spectra were determined on a Hewlett Packard 5988A spectrometer by direct inlet at 70 eV. High-resolution mass spectral analysis (HRMS) data were measured on a Bruker Apex II. Element analysis (EA) data were measured on a Vario EL. All products were identified by <sup>1</sup>H and <sup>13</sup>C NMR, MS, HRMS. The starting materials were purchased from Energy, J&K Chemicals or Aldrich and used without further purification.

#### Typical procedure

(1) A mixture of isocyanides (1 equiv., 0.25 mmol), Iron(II) chloride (0.2 equiv., 0.05 mmol), Hydrogen peroxide (3 eq, 0.75 mmol) and DMSO (3 mL) was stirred at 25 °C under nitrogen condition for 6 h in a sealed tube (15 mL). After the reaction finished, the mixture was extracted

with ethyl acetate and water, evaporated under vacuum and purified by column chromatography to afford the desired product.

(2) A mixture of isocyanides (1 equiv., 0.25 mmol), Iron(II) chloride (0.2 equiv., 0.05 mmol), Hydrogen peroxide (3 eq, 0.75 mmol) and DMSO-*d*<sup>6</sup> (1 mL) was stirred at 20°C under nitrogen condition for 12 h in a sealed tube (15 mL). After the reaction finished, the mixture was extracted with ethyl acetate and water, evaporated under vacuum and purified by column chromatography to afford the desired product.

### The modification of the methylation reaction condition

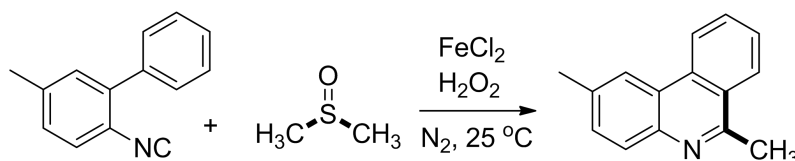

| Entry           | Catalyst (equiv)        | Hydrogen peroxide (30 %), (equiv) | t/h | Yield (%) <sup>b</sup> |
|-----------------|-------------------------|-----------------------------------|-----|------------------------|
| 1               | FeCl <sub>2</sub> (0.5) | 3                                 | 3   | 52                     |
| 2               | FeCl <sub>2</sub> (0.5) | 3                                 | 6   | 55                     |
| 3               | FeCl <sub>2</sub> (0.5) | 3                                 | 10  | 52                     |
| 4 <sup>c</sup>  | FeCl <sub>2</sub> (0.5) | 3                                 | 6   | 30                     |
| 5 <sup>d</sup>  | FeCl <sub>2</sub> (0.5) | 3                                 | 6   | 40                     |
| 6 <sup>e</sup>  | FeCl <sub>2</sub> (0.5) | 3                                 | 6   | 50                     |
| 7               | -                       | 3                                 | 6   | n. r.                  |
| 8               | FeCl <sub>2</sub> (0.1) | 3                                 | 6   | 63                     |
| 9               | FeCl <sub>2</sub> (0.2) | 3                                 | 6   | 70                     |
| 10              | FeCl <sub>2</sub> (0.3) | 3                                 | 6   | 55                     |
| 11              | FeCl <sub>2</sub> (0.4) | 3                                 | 6   | 55                     |
| 12              | FeCl <sub>2</sub> (0.2) | 1                                 | 6   | 20                     |
| 13              | FeCl <sub>2</sub> (0.2) | 2                                 | 6   | 36                     |
| 14              | FeCl <sub>2</sub> (0.2) | 4                                 | 6   | 56                     |
| 15 <sup>f</sup> | FeCl <sub>2</sub> (0.2) | 3                                 | 6   | 60                     |
| 16              | CoCl <sub>2</sub> (0.2) | 3                                 | 6   | n. r.                  |
| 17              | NiCl <sub>2</sub> (0.2) | 3                                 | 6   | n. r.                  |
| 18              | CuCl (0.2)              | 3                                 | 6   | n. r.                  |
| 19 <sup>g</sup> | FeCl <sub>2</sub> (0.2) | 3                                 | 6   | n. r.                  |

|                 |                         |   |   |       |
|-----------------|-------------------------|---|---|-------|
| 20 <sup>b</sup> | FeCl <sub>2</sub> (0.2) | 3 | 6 | n. r. |
|-----------------|-------------------------|---|---|-------|

<sup>a</sup> Reaction conditions: 2-isocyanato-5-methyl-1,1'-biphenyl (1 equiv., 0.25 mmol), DMSO (3 mL), 25 °C, N<sub>2</sub>. <sup>b</sup> Isolated yields. <sup>c</sup> DMSO (1 mL). <sup>d</sup> DMSO (2 mL). <sup>e</sup> DMSO (4 mL). <sup>f</sup> 50°C. <sup>g</sup> DMF (3 mL). <sup>h</sup> CH<sub>3</sub>CN (3 mL).

Physical data and references for the following products

All known compounds are determined by <sup>1</sup>H NMR and <sup>13</sup>C NMR, MS analysis and compared with which were cited in the following references, and the new compounds were further confirmed by HRMS.

References:

1. Z. J. Li, F. H. Fan, J. Yang and Z.-Q. Liu, *Org. Lett.* 2014, **16**, 3396.
2. Z. Xu, C. Yan and Z.-Q. Liu, *Org. Lett.* 2014, **16**, 5670.
3. T. Xiao, L. Li, G. Lin, Q. Wang, P. Zhang, Z.-W. Mao and L. Zhou, *Green Chemistry*. 2014, **16**, 2418.
4. Q. Dai, J. Yu, X. Feng, Y. Jiang, H. Yang and J. Cheng, *Advanced Synthesis & Catalysis*. 2014, **356**, 3341.
5. R. Caporaso, S. Manna, S. Zinken, A. R. Kochnev, E. R. Lukyanenko, A. V. Kurkin and A. P. Antonchick, *Chem. Commun.* 2016, **52**, 12486.
6. Z.-J. Li, X. Cui, L. Niu, Y. Ren, M. Bian, X. Yang, B. Yang, Q.-Q. Yan and J. Zhao, *Adv. Synth. & Catal.* 2017, **359**, 246.

Physical data for the following products:

1. 6-methylphenanthridine

A light yellow solid after purification by flash column chromatography (petroleum ether/ethyl acetate = 10/1), m. p. 69-71°C.

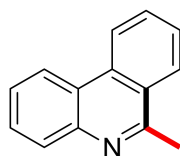

<sup>1</sup>H NMR (600 MHz, CDCl<sub>3</sub>): δ 8.63 (d, *J* = 8.4 Hz, 1H), 8.54 (dd, *J* = 8.4, 1.2 Hz, 1H), 8.22 (dd, *J* = 7.8, 0.6 Hz, 1H), 8.11 (d, *J* = 8.4 Hz, 1H), 7.84 (ddd, *J* = 8.4, 7.2, 1.2 Hz, 1H), 7.72 – 7.68 (m, 2H), 7.63 – 7.61 (m, 1H), 3.05 (s, 3H).

<sup>13</sup>C NMR (150 MHz, CDCl<sub>3</sub>): δ 158.8, 143.7, 132.6, 130.4, 129.4, 128.6, 127.3, 126.5, 126.3, 125.9, 123.8, 122.3, 121.9, 23.3.

MS(EI): m/z(%): 193(100.0), 178(14.3), 165(14.0).

2. 8-chloro-6-methylphenanthridine

A white solid after purification by flash column chromatography (petroleum ether/ethyl acetate = 10/1), m. p. 105-107°C.

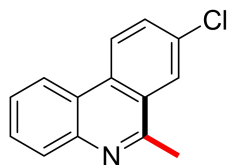

$^1\text{H}$  NMR (600 MHz,  $\text{CDCl}_3$ ):  $\delta$  8.50 (d,  $J = 9.0$  Hz, 1H), 8.44 (d,  $J = 7.8$  Hz, 1H), 8.14 (d,  $J = 1.8$  Hz, 1H), 8.08 (dd,  $J = 7.8, 0.6$  Hz, 1H), 7.75 (dd,  $J = 9.0, 2.4$  Hz, 1H), 7.72 – 7.70 (m, 1H), 7.62 – 7.60 (m, 1H), 2.99 (s, 3H).

$^{13}\text{C}$  NMR (150 MHz,  $\text{CDCl}_3$ ):  $\delta$  157.7, 143.6, 133.1, 130.9, 130.9, 129.5, 128.9, 126.8, 126.7, 125.8, 124.1, 123.1, 121.8, 23.2.

MS(EI):  $m/z$ (%): 230(4.9), 229(30.6), 228(16.7), 227(100.0), 192(9.4), 191(7.0), 190(6.2), 165(5.9).

### 3. 2,6-dimethylphenanthridine

A white solid after purification by flash column chromatography (petroleum ether/ethyl acetate = 10/1), m. p. 69-71°C.

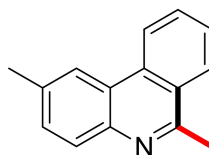

$^1\text{H}$  NMR (600 MHz,  $\text{CDCl}_3$ ):  $\delta$  8.61 (d,  $J = 8.4$  Hz, 1H), 8.31 (s, 1H), 8.20 (d,  $J = 8.4$  Hz, 1H), 7.99 (d,  $J = 8.4$  Hz, 1H), 7.81 (t,  $J = 8.4$  Hz, 1H), 7.67 (t,  $J = 7.8$  Hz, 1H), 7.53 (dd,  $J = 7.8, 1.8$  Hz, 1H), 3.02 (s, 3H), 2.61 (s, 3H).

$^{13}\text{C}$  NMR (150 MHz,  $\text{CDCl}_3$ ):  $\delta$  157.8, 142.0, 136.0, 132.3, 130.3, 130.2, 129.1, 127.1, 126.5, 126.0, 123.6, 122.3, 121.6, 23.3, 21.9.

MS(EI):  $m/z$ (%): 208(17.6), 207(100.0), 206(35.9), 192(6.9), 190(5.2), 165(8.1).

### 4. 2,6,8-trimethylphenanthridine

A white solid after purification by flash column chromatography (petroleum ether/ethyl acetate = 10/1), m. p. 106-108°C.

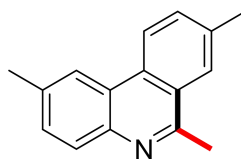

$^1\text{H}$  NMR (600 MHz,  $\text{CDCl}_3$ ):  $\delta$  8.50 (d,  $J = 8.4$  Hz, 1H), 8.28 (s, 1H), 7.97 – 7.96 (m, 2H), 7.65 (dd,  $J = 8.4, 1.8$  Hz, 1H), 7.50 (dd,  $J = 8.4, 1.2$  Hz, 1H), 3.00 (s, 3H), 2.60 (s, 6H).

$^{13}\text{C}$  NMR (150 MHz,  $\text{CDCl}_3$ ):  $\delta$  157.5, 141.7, 137.0, 136.0, 131.9, 130.2, 129.8, 129.0, 126.1, 126.0, 123.7, 122.2, 121.4, 23.3, 21.9, 21.8

MS(EI):  $m/z$ (%): 222(16.8), 221(100.0), 220(37.1), 206(38.0).

#### 5. 8-chloro-2,6-dimethylphenanthridine

A white solid after purification by flash column chromatography (petroleum ether/ethyl acetate = 10/1), M. P.: 132-134°C.

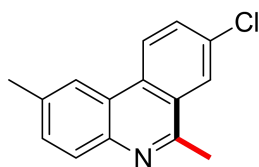

$^1\text{H}$  NMR (600 MHz,  $\text{CDCl}_3$ ):  $\delta$  8.51 (dd,  $J = 8.4, 2.4$  Hz, 1H), 8.22 (s, 1H), 8.13 (s, 1H), 7.97 (d,  $J = 7.8$  Hz, 1H), 7.74 (d,  $J = 9.0$ , 1H), 7.53 (d,  $J = 7.8$  Hz, 1H), 2.98 (s, 3H), 2.60 (s, 3H).

$^{13}\text{C}$  NMR (150 MHz,  $\text{CDCl}_3$ ):  $\delta$  156.6, 142.0, 136.6, 133.0, 130.7, 130.7, 130.6, 129.2, 126.9, 125.8, 124.0, 122.9, 121.4, 23.2, 21.9.

HRMS (ESI,  $m/z$ ): Calculated for  $\text{C}_{15}\text{H}_{13}\text{ClN}$  ( $\text{M}+\text{H}$ ) $^+$  242.0731, found 242.0733.

#### 6. 8-(tert-butyl)-2,6-dimethylphenanthridine

A light yellow solid after purification by flash column chromatography (petroleum ether/ethyl acetate = 10/1), m. p. 109-110°C.

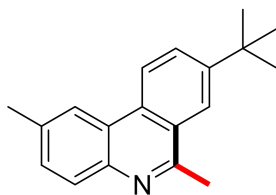

$^1\text{H}$  NMR (600 MHz,  $\text{CDCl}_3$ ):  $\delta$  8.54 (d,  $J = 8.4$  Hz, 1H), 8.29 (s, 1H), 8.14 (d,  $J = 1.8$  Hz, 1H), 7.97 (d,  $J = 8.4$  Hz, 1H), 7.90 (dd,  $J = 8.4, 1.8$  Hz, 1H), 7.50 (dd,  $J = 8.4, 1.8$  Hz, 1H), 3.04 (s, 3H), 2.61 (s, 3H), 1.48 (s, 9H).

$^{13}\text{C}$  NMR (150 MHz,  $\text{CDCl}_3$ ):  $\delta$  157.9, 150.2, 141.8, 135.9, 130.2, 129.9, 128.9, 128.6, 125.9, 123.6, 122.1, 121.9, 121.4, 35.1, 31.4, 23.3, 21.9.

HRMS (ESI,  $m/z$ ): Calculated for  $\text{C}_{19}\text{H}_{22}\text{N}$  ( $\text{M}+\text{H}$ ) $^+$  264.1747, found 264.1751.

### 7. 2,6-dimethyl-8-phenylphenanthridine

A white solid after purification by flash column chromatography (petroleum ether/ethyl acetate = 10/1), m. p. 118-120°C.

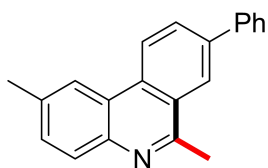

$^1\text{H}$  NMR (600 MHz,  $\text{CDCl}_3$ ):  $\delta$  8.66 (d,  $J = 9.0$  Hz, 1H), 8.37 (d,  $J = 1.8$  Hz, 1H), 8.33 (s, 1H), 8.06 (dd,  $J = 8.4, 1.2$  Hz, 1H), 8.00 (d,  $J = 8.4$  Hz, 1H), 7.75 (d,  $J = 7.2$  Hz, 2H), 7.54 (t,  $J = 7.2$  Hz, 3H), 7.44 (t,  $J = 7.2$  Hz, 1H), 3.08 (s, 3H), 2.63 (s, 3H).

$^{13}\text{C}$  NMR (150 MHz,  $\text{CDCl}_3$ ):  $\delta$  157.9, 142.0, 140.5, 140.0, 136.2, 131.4, 130.3, 129.5, 129.1, 129.0, 127.8, 127.4, 126.3, 124.6, 123.4, 122.9, 121.6, 23.3, 21.9.

HRMS (ESI,  $m/z$ ): Calculated for  $\text{C}_{21}\text{H}_{18}\text{N}$  ( $\text{M}+\text{H}$ ) $^+$  284.1434, found 284.1438.

### 8. 2,4,6-trimethylphenanthridine

A white solid after purification by flash column chromatography (petroleum ether/ethyl acetate = 10/1), m. p. 99-100°C.

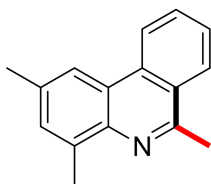

$^1\text{H}$  NMR (600 MHz,  $\text{CDCl}_3$ ):  $\delta$  8.61 (d,  $J = 8.4$  Hz, 1H), 8.19 (d,  $J = 8.4$  Hz, 2H), 7.80 – 7.78 (m, 1H), 7.66 (t,  $J = 7.8$  Hz, 1H), 7.41 (s, 1H), 3.04 (s, 3H), 2.84 (s, 3H), 2.57 (s, 3H).

$^{13}\text{C}$  NMR (150 MHz,  $\text{CDCl}_3$ ):  $\delta$  156.2, 140.8, 136.8, 135.3, 132.6, 131.0, 129.8, 126.8, 126.3, 125.7, 123.4, 122.5, 119.4, 23.6, 21.8, 18.2.

HRMS (ESI,  $m/z$ ): Calculated for  $\text{C}_{16}\text{H}_{16}\text{N}$  ( $\text{M}+\text{H}$ ) $^+$  222.1277, found 222.1280.

### 9. 2-fluoro-6-methylphenanthridine

A yellow solid after purification by flash column chromatography (petroleum ether/ethyl acetate = 10/1), m. p. 110-112°C.

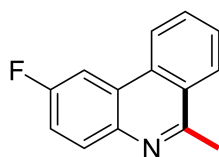

$^1\text{H}$  NMR (600 MHz,  $\text{CDCl}_3$ ):  $\delta$  8.50 (d,  $J = 7.8$  Hz, 1H), 8.23 (d,  $J = 8.4$  Hz, 1H), 8.14 (dd,  $J = 10.2, 3.0$  Hz, 1H), 8.08 (dd,  $J = 9.0, 6.0$  Hz, 1H), 7.86 (t,  $J = 7.8$  Hz, 1H), 7.74 (t,  $J = 7.8$  Hz, 1H), 7.46 – 7.43 (m, 1H), 3.02 (s, 3H).

$^{13}\text{C}$  NMR (150 MHz,  $\text{CDCl}_3$ ):  $\delta$  161.7, 160.1, 158.0, 140.6, 131.5 (d,  $J = 9.0$  Hz), 130.5, 127.9, 126.6, 125.9, 125.0 (d,  $J = 9.0$  Hz), 122.5, 117.4 (d,  $J = 24.0$  Hz), 106.9 (d,  $J = 22.9$  Hz), 23.3.

MS(EI):  $m/z$ (%): 211(100.0), 196(12.0), 183(17.0).

#### 10. 2-chloro-6-methylphenanthridine

A white solid after purification by flash column chromatography (petroleum ether/ethyl acetate = 10/1), m. p. 103-105°C.

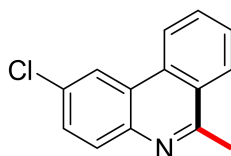

$^1\text{H}$  NMR (600 MHz,  $\text{CDCl}_3$ ):  $\delta$  8.49 (d,  $J = 8.4$  Hz, 1H), 8.44 (d,  $J = 1.2$  Hz, 1H), 8.19 (d,  $J = 7.8$  Hz, 1H), 8.00 (d,  $J = 9.0$  Hz, 1H), 7.83 (t,  $J = 8.4$  Hz, 1H), 7.72 – 7.70 (m, 1H), 7.62 (dd,  $J = 8.4, 2.4$  Hz, 1H), 3.00 (s, 3H).

$^{13}\text{C}$  NMR (150 MHz,  $\text{CDCl}_3$ ):  $\delta$  159.1, 142.1, 132.1, 131.5, 130.8, 130.7, 129.0, 127.9, 126.5, 126.0, 124.8, 122.3, 121.6, 23.3.

MS(EI):  $m/z$ (%): 230(4.9), 229(30.7), 228(17.6), 227(100.0), 192(7.5), 191(6.5), 190(6.1), 165(6.2).

#### 13. ethyl 1-methyl-4-phenylisoquinoline-3-carboxylate

A white solid after purification by flash column chromatography (petroleum ether/ethyl acetate = 5/1), m. p. 104-106°C.

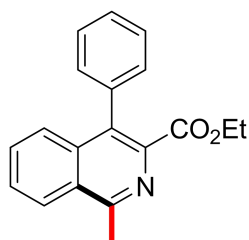

$^1\text{H}$  NMR (600 MHz,  $\text{CDCl}_3$ ):  $\delta$  8.20 (d,  $J = 8.4$  Hz, 1H), 7.67 (ddd,  $J = 8.4, 5.4, 3.0$  Hz, 1H), 7.65 – 7.62 (m, 2H), 7.49 – 7.43 (m, 3H), 7.34 (dd,  $J = 7.8, 1.8$  Hz, 2H), 4.11 (q,  $J = 7.2$  Hz, 2H), 3.06 (s, 3H), 0.97 (t,  $J = 7.2$  Hz, 3H).

$^{13}\text{C}$  NMR (150 MHz,  $\text{CDCl}_3$ ):  $\delta$  167.6, 158.4, 141.4, 136.4, 135.4, 131.9, 130.4, 129.9, 128.1, 128.0, 127.8, 127.7, 126.9, 125.6, 61.2, 22.6, 13.6.

HRMS (ESI,  $m/z$ ): Calculated for  $\text{C}_{19}\text{H}_{18}\text{NO}_2$  ( $\text{M}+\text{H}$ ) $^+$  292.1332, found 292.1331.

14. ethyl 1,7-dimethyl-4-(*p*-tolyl)isoquinoline-3-carboxylate

A light yellow liquid after purification by flash column chromatography (petroleum ether/ethyl acetate = 5/1).

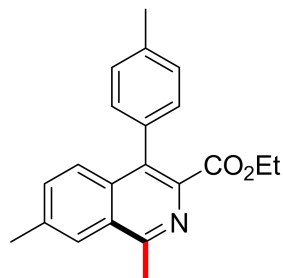

$^1\text{H}$  NMR (600 MHz,  $\text{CDCl}_3$ ):  $\delta$  7.95 (s, 1H), 7.56 (d,  $J$  = 8.4 Hz, 1H), 7.45 (dd,  $J$  = 9.0, 1.2 Hz, 1H), 7.27 (d,  $J$  = 7.8 Hz, 2H), 7.21 (d,  $J$  = 7.8 Hz, 2H), 4.14 (q,  $J$  = 7.2 Hz, 2H), 3.02 (s, 3H), 2.57 (s, 3H), 2.45 (s, 3H), 1.02 (t,  $J$  = 7.2 Hz, 3H).

$^{13}\text{C}$  NMR (150 MHz,  $\text{CDCl}_3$ ):  $\delta$  167.7, 157.4, 140.6, 138.2, 137.3, 133.7, 133.5, 132.4, 132.0, 129.8, 128.8, 128.0, 126.8, 124.6, 61.1, 22.6, 21.9, 21.3, 13.7.

HRMS (ESI,  $m/z$ ): Calculated for  $\text{C}_{21}\text{H}_{22}\text{NO}_2$  ( $\text{M}+\text{H}$ ) $^+$  320.1645, found 320.1644.

15. ethyl 7-fluoro-4-(4-fluorophenyl)-1-methylisoquinoline-3-carboxylate

A light yellow solid after purification by flash column chromatography (petroleum ether/ethyl acetate = 5/1), m. p. 130-132°C.

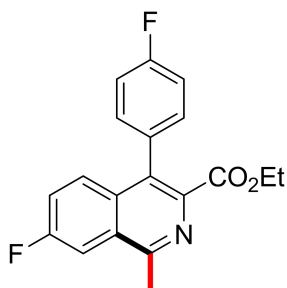

$^1\text{H}$  NMR (600 MHz,  $\text{CDCl}_3$ ):  $\delta$  7.79 (dd,  $J$  = 9.6, 2.4 Hz, 1H), 7.61 (dd,  $J$  = 9.0, 5.4 Hz, 1H), 7.43 – 7.40 (m, 1H), 7.31 – 7.28 (m, 2H), 7.18 (t,  $J$  = 8.4 Hz, 2H), 4.15 (q,  $J$  = 7.2 Hz, 2H), 3.01 (s, 3H), 1.04 (t,  $J$  = 7.2 Hz, 3H).

$^{13}\text{C}$  NMR (150 MHz,  $\text{CDCl}_3$ ):  $\delta$  167.2, 162.1 (dd,  $J$  = 246.2, 162.6 Hz), 157.9, 141.1, 132.6, 131.9 (d,  $J$  = 3.6 Hz), 131.5 (d,  $J$  = 8.1 Hz), 130.8, 129.7 (d,  $J$  = 8.7 Hz), 129.0



(d,  $J = 8.3$  Hz), 120.8 (d,  $J = 24.6$  Hz), 115.3 (d,  $J = 21.5$  Hz), 109.5 (d,  $J = 21.1$  Hz), 61.4, 22.6, 13.8.

HRMS (ESI,  $m/z$ ): Calculated for  $C_{19}H_{16}F_2NO_2$  ( $M+H$ )<sup>+</sup> 328.1144, found 328.1146.

16. ethyl 7-chloro-4-(4-chlorophenyl)-1-methylisoquinoline-3-carboxylate

A light yellow solid after purification by flash column chromatography (petroleum ether/ethyl acetate = 5/1), m. p. 106-108°C.

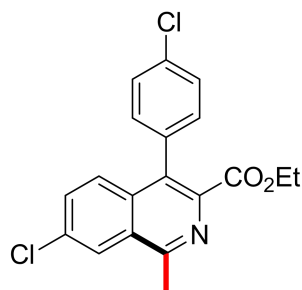

<sup>1</sup>H NMR (600 MHz,  $CDCl_3$ ):  $\delta$  8.18 (d,  $J = 1.8$  Hz, 1H), 7.59 (dd,  $J = 9.0, 2.4$  Hz, 1H), 7.53 (d,  $J = 9.0$  Hz, 1H), 7.47 (d,  $J = 8.4$  Hz, 2H), 7.26 (d,  $J = 7.8$  Hz, 2H), 4.16 (q,  $J = 7.2$  Hz, 2H), 3.03 (s, 3H), 1.06 (t,  $J = 7.2$  Hz, 3H).

<sup>13</sup>C NMR (150 MHz,  $CDCl_3$ ):  $\delta$  167.0, 158.0, 141.5, 134.5, 134.3, 134.2, 133.7, 131.5, 131.2, 130.6, 128.6, 128.4, 124.8, 61.5, 22.6, 13.7.

HRMS (ESI,  $m/z$ ): Calculated for  $C_{19}H_{16}Cl_2NO_2$  ( $M+H$ )<sup>+</sup> 360.0553, found 360.0554.

17. A light yellow solid after purification by flash column chromatography (petroleum ether/ethyl acetate = 10/1), m. p. 75-76°C.

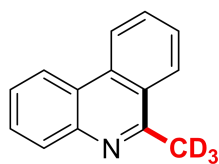

<sup>1</sup>H NMR (600 MHz,  $CDCl_3$ ):  $\delta$  8.63 (d,  $J = 8.4$  Hz, 1H), 8.54 (d,  $J = 7.8$  Hz, 1H), 8.22 (d,  $J = 8.4$  Hz, 1H), 8.10 (d,  $J = 8.4$  Hz, 1H), 7.86 – 7.83 (m, 1H), 7.71 (td,  $J = 8.4, 1.2$  Hz, 2H), 7.64 – 7.61 (m, 1H).

<sup>13</sup>C NMR (150 MHz,  $CDCl_3$ ):  $\delta$  158.8, 143.8, 132.6, 130.4, 129.4, 128.6, 127.3, 126.5, 126.3, 125.9, 123.8, 122.3, 121.9, 23.0 – 22.6 (m).

HRMS (ESI,  $m/z$ ): Calculated for  $C_{14}H_9D_3N$  ( $M+H$ )<sup>+</sup> 197.1199, found 197.1192.

18. A light yellow solid after purification by flash column chromatography (petroleum ether/ethyl acetate = 10/1), m. p. 78-79°C.

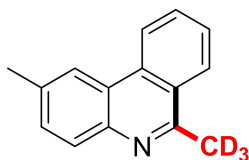

$^1\text{H}$  NMR (600 MHz,  $\text{CDCl}_3$ ):  $\delta$  8.61 (d,  $J = 8.4$  Hz, 1H), 8.32 (s, 1H), 8.20 (d,  $J = 8.4$  Hz, 1H), 7.99 (d,  $J = 7.8$  Hz, 1H), 7.83 – 7.80 (m, 1H), 7.68 (t,  $J = 7.8$  Hz, 1H), 7.53 (dd,  $J = 8.4, 1.8$  Hz, 1H), 2.61 (s, 3H).

$^{13}\text{C}$  NMR (150 MHz,  $\text{CDCl}_3$ ):  $\delta$  157.8, 142.0, 136.1, 132.4, 130.3, 130.2, 129.1, 127.1, 126.5, 126.0, 123.6, 122.3, 121.6, 23.0 – 22.5 (m), 21.9.

HRMS (ESI,  $m/z$ ): Calculated for  $\text{C}_{15}\text{H}_{11}\text{D}_3\text{N}$  ( $\text{M}+\text{H}$ ) $^+$  211.1356, found 211.1358.

19. A light yellow solid after purification by flash column chromatography (petroleum ether/ethyl acetate = 5/1), m. p. 135-137°C.

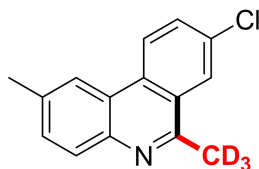

$^1\text{H}$  NMR (600 MHz,  $\text{CDCl}_3$ ):  $\delta$  8.49 (d,  $J = 8.4$  Hz, 1H), 8.21 (s, 1H), 8.11 (d,  $J = 1.2$  Hz, 1H), 7.96 (d,  $J = 8.4$  Hz, 1H), 7.72 (d,  $J = 9.0$  Hz, 1H), 7.53 (d,  $J = 8.4$  Hz, 1H), 2.59 (s, 3H).

$^{13}\text{C}$  NMR (150 MHz,  $\text{CDCl}_3$ ):  $\delta$  156.6, 141.9, 136.6, 132.9, 130.7, 130.6, 129.2, 126.8, 125.8, 124.0, 122.9, 121.4, 23.0 – 22.5 (m), 21.9.

HRMS (ESI,  $m/z$ ): Calculated for  $\text{C}_{15}\text{H}_{10}\text{D}_3\text{ClN}$  ( $\text{M}+\text{H}$ ) $^+$  245.0919, found 245.0920.

20. A light yellow solid after purification by flash column chromatography (petroleum ether/ethyl acetate = 5/1), m. p. 110-112°C.

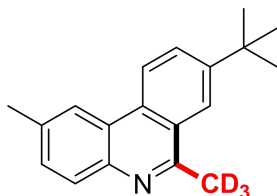

$^1\text{H}$  NMR (600 MHz,  $\text{CDCl}_3$ ):  $\delta$  8.54 (d,  $J = 9.0$  Hz, 1H), 8.29 (s, 1H), 8.14 (s, 1H), 7.97 (d,  $J = 7.8$  Hz, 1H), 7.90 (dd,  $J = 8.4, 1.8$  Hz, 1H), 7.50 (d,  $J = 7.8$  Hz, 1H), 2.61 (s, 3H), 1.48 (s, 9H).

$^{13}\text{C}$  NMR (150 MHz,  $\text{CDCl}_3$ ):  $\delta$  157.8, 150.1, 141.8, 135.9, 130.1, 129.9, 128.9, 128.6, 125.9, 123.6, 122.1, 121.9, 121.4, 35.1, 31.3, 23.0 – 22.6 (m), 21.9.

HRMS (ESI,  $m/z$ ): Calculated for  $\text{C}_{19}\text{H}_{19}\text{D}_3\text{N}$  ( $\text{M}+\text{H}$ ) $^+$  267.1935, found 267.1932.

21. A light yellow solid after purification by flash column chromatography (petroleum ether/ethyl acetate = 5/1).

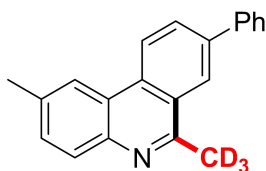

$^1\text{H}$  NMR (600 MHz,  $\text{CDCl}_3$ ):  $\delta$  8.66 (d,  $J = 8.4$  Hz, 1H), 8.36 (s, 1H), 8.33 (s, 1H), 8.06 (dd,  $J = 8.4, 1.8$  Hz, 1H), 8.00 (d,  $J = 8.4$  Hz, 1H), 7.75 (d,  $J = 7.8$  Hz, 2H), 7.54 (t,  $J = 7.8$  Hz, 3H), 7.44 (t,  $J = 7.2$  Hz, 1H), 2.63 (s, 3H).

$^{13}\text{C}$  NMR (150 MHz,  $\text{CDCl}_3$ ):  $\delta$  157.8, 142.0, 140.5, 140.0, 136.2, 131.4, 130.3, 129.5, 129.1, 129.0, 127.8, 127.4, 126.4, 124.6, 123.4, 122.9, 121.6, 21.9.

HRMS (ESI,  $m/z$ ): Calculated for  $\text{C}_{21}\text{H}_{15}\text{D}_3\text{N}$  ( $\text{M}+\text{H}$ ) $^+$  287.1669, found 287.1667.

22. A white solid after purification by flash column chromatography (petroleum ether/ethyl acetate = 5/1), m. p. 124-126°C.

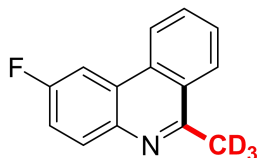

$^1\text{H}$  NMR (600 MHz,  $\text{CDCl}_3$ ):  $\delta$  8.49 (d,  $J = 8.4$  Hz, 1H), 8.22 (d,  $J = 7.8$  Hz, 1H), 8.13 (dd,  $J = 9.6, 2.4$  Hz, 1H), 8.08 (dd,  $J = 9.0, 5.4$  Hz, 1H), 7.86 – 7.84 (m, 1H), 7.75 – 7.72 (m, 1H), 7.44 (td,  $J = 8.4, 2.4$  Hz, 1H).

$^{13}\text{C}$  NMR (150 MHz,  $\text{CDCl}_3$ ):  $\delta$  160.9 (d,  $J = 244.3$  Hz), 158.0, 140.6, 132.0, 131.5 (d,  $J = 9.0$  Hz), 130.5, 127.9, 126.6, 126.0, 125.0 (d,  $J = 9.2$  Hz), 122.5, 117.4 (d,  $J = 24.0$  Hz), 106.9 (d,  $J = 23.1$  Hz).

HRMS (ESI,  $m/z$ ): Calculated for  $\text{C}_{14}\text{H}_8\text{D}_3\text{FN}$  ( $\text{M}+\text{H}$ ) $^+$  215.1105, found 215.1099.

23. A white solid after purification by flash column chromatography (petroleum ether/ethyl acetate = 5/1), m. p. 109-111°C.

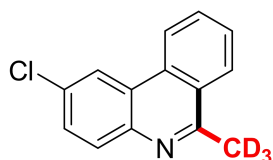

$^1\text{H}$  NMR (600 MHz,  $\text{CDCl}_3$ ):  $\delta$  8.52 (d,  $J = 8.4$  Hz, 1H), 8.47 (d,  $J = 2.4$  Hz, 1H), 8.21 (d,  $J = 8.4$  Hz, 1H), 8.01 (d,  $J = 9.0$  Hz, 1H), 7.86 – 7.84 (m, 1H), 7.74 – 7.71 (m, 1H), 7.64 (dd,  $J = 8.4, 2.4$  Hz, 1H).

$^{13}\text{C}$  NMR (150 MHz,  $\text{CDCl}_3$ ):  $\delta$  159.1, 142.1, 132.1, 131.5, 130.8, 130.7, 129.0, 127.9, 126.6, 126.0, 124.8, 122.3, 121.6, 23.2 – 22.6 (m).

HRMS (ESI,  $m/z$ ): Calculated for  $\text{C}_{14}\text{H}_8\text{D}_3\text{ClN}$  ( $\text{M}+\text{H}$ ) $^+$  231.0809, found 231.0807.

24. A light yellow solid after purification by flash column chromatography (petroleum ether/ethyl acetate = 5/1), m. p. 108-110°C.

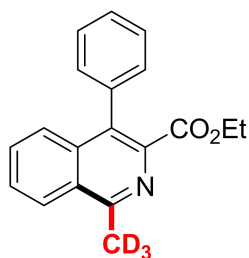

$^1\text{H}$  NMR (600 MHz,  $\text{CDCl}_3$ ):  $\delta$  8.20 (d,  $J = 8.4$  Hz, 1H), 7.69 – 7.66 (m, 1H), 7.65 – 7.63 (m, 2H), 7.49 – 7.44 (m, 3H), 7.34 (dd,  $J = 7.8, 1.8$  Hz, 2H), 4.11 (q,  $J = 7.2$  Hz, 2H), 0.97 (t,  $J = 7.2$  Hz, 3H).

$^{13}\text{C}$  NMR (150 MHz,  $\text{CDCl}_3$ ):  $\delta$  167.6, 158.4, 141.5, 136.4, 135.4, 131.9, 130.4, 130.0, 128.1, 128.1, 127.9, 127.8, 126.9, 125.6, 61.2, 22.1 – 21.7 (m), 13.6.

HRMS (ESI,  $m/z$ ): Calculated for  $\text{C}_{19}\text{H}_{15}\text{D}_3\text{NO}_2$  ( $\text{M}+\text{H}$ ) $^+$  295.1567, found 295.1565.

25. A light yellow liquid after purification by flash column chromatography (petroleum ether/ethyl acetate = 5/1).

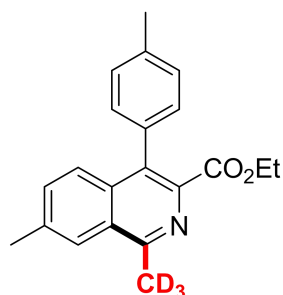

$^1\text{H}$  NMR (600 MHz,  $\text{CDCl}_3$ ):  $\delta$  7.94 (s, 1H), 7.56 (d,  $J = 8.4$  Hz, 1H), 7.45 (d,  $J = 8.4$  Hz, 1H), 7.27 (d,  $J = 7.8$  Hz, 2H), 7.21 (d,  $J = 7.8$  Hz, 2H), 4.14 (q,  $J = 7.2$  Hz, 2H), 2.57 (s, 3H), 2.45 (s, 3H), 1.02 (t,  $J = 7.2$  Hz, 3H).

$^{13}\text{C}$  NMR (150 MHz,  $\text{CDCl}_3$ ):  $\delta$  167.7, 157.3, 140.6, 138.2, 137.3, 133.7, 133.5, 132.4, 132.0, 129.8, 128.7, 128.0, 126.8, 124.6, 61.1, 21.9, 21.3, 13.7.

HRMS (ESI,  $m/z$ ): Calculated for  $\text{C}_{21}\text{H}_{19}\text{D}_3\text{NO}_2$  ( $\text{M}+\text{H}$ ) $^+$  323.1880, found 323.1875.

26. A light yellow solid after purification by flash column chromatography (petroleum ether/ethyl acetate = 5/1), m. p. 138-140°C.

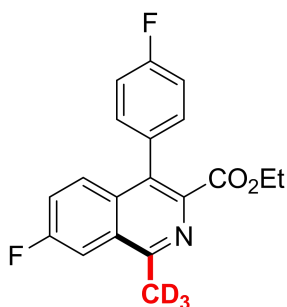

$^1\text{H}$  NMR (600 MHz,  $\text{CDCl}_3$ ):  $\delta$  7.79 (dd,  $J = 9.6, 2.4$  Hz, 1H), 7.62 (dd,  $J = 9.6, 5.4$  Hz, 1H), 7.44 – 7.40 (m, 1H), 7.31 – 7.28 (m, 2H), 7.18 (t,  $J = 8.4$  Hz, 2H), 4.15 (q,  $J = 7.2$  Hz, 2H), 1.05 (t,  $J = 7.2$  Hz, 3H).

$^{13}\text{C}$  NMR (150 MHz,  $\text{CDCl}_3$ ):  $\delta$  167.2, 162.1 (dd,  $J = 246.2, 162.6$  Hz), 157.9, 141.2, 132.6, 131.9 (d,  $J = 3.6$  Hz), 131.6 (d,  $J = 8.1$  Hz), 130.8, 129.7 (d,  $J = 8.7$  Hz), 129.0 (d,  $J = 8.3$  Hz), 120.8 (d,  $J = 24.6$  Hz), 115.3 (d,  $J = 21.5$  Hz), 109.5 (d,  $J = 21.1$  Hz), 61.4, 22.1-21.9 (m), 13.8.

HRMS (ESI,  $m/z$ ): Calculated for  $\text{C}_{19}\text{H}_{13}\text{D}_3\text{F}_2\text{NO}_2$  ( $\text{M}+\text{H}$ ) $^+$  331.1378, found 331.1375.

27. A light yellow solid after purification by flash column chromatography (petroleum ether/ethyl acetate = 5/1), m. p. 107-109°C.

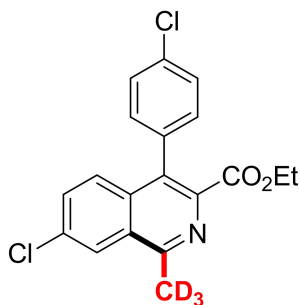

$^1\text{H}$  NMR (600 MHz,  $\text{CDCl}_3$ ):  $\delta$  8.18 (d,  $J = 1.8$  Hz, 1H), 7.59 (dd,  $J = 9.0, 1.8$  Hz, 1H), 7.53 (d,  $J = 8.4$  Hz, 1H), 7.47 (d,  $J = 7.8$  Hz, 2H), 7.26 (d,  $J = 8.4$  Hz, 2H), 4.16 (q,  $J = 7.2$  Hz, 2H), 1.06 (t,  $J = 7.2$  Hz, 3H).

$^{13}\text{C}$  NMR (150 MHz,  $\text{CDCl}_3$ ):  $\delta$  166.9, 157.9, 141.6, 134.5, 134.4, 134.3, 133.7, 131.5, 131.2, 130.6, 128.6, 128.4, 124.8, 61.5, 13.8.

HRMS (ESI,  $m/z$ ): Calculated for  $\text{C}_{19}\text{H}_{13}\text{D}_3\text{Cl}_2\text{NO}_2$  ( $\text{M}+\text{H}$ ) $^+$  363.0787, found 363.0785.

# Copies of the $^1\text{H}$ NMR, $^{13}\text{C}$ NMR

## $^1\text{H}$ NMR

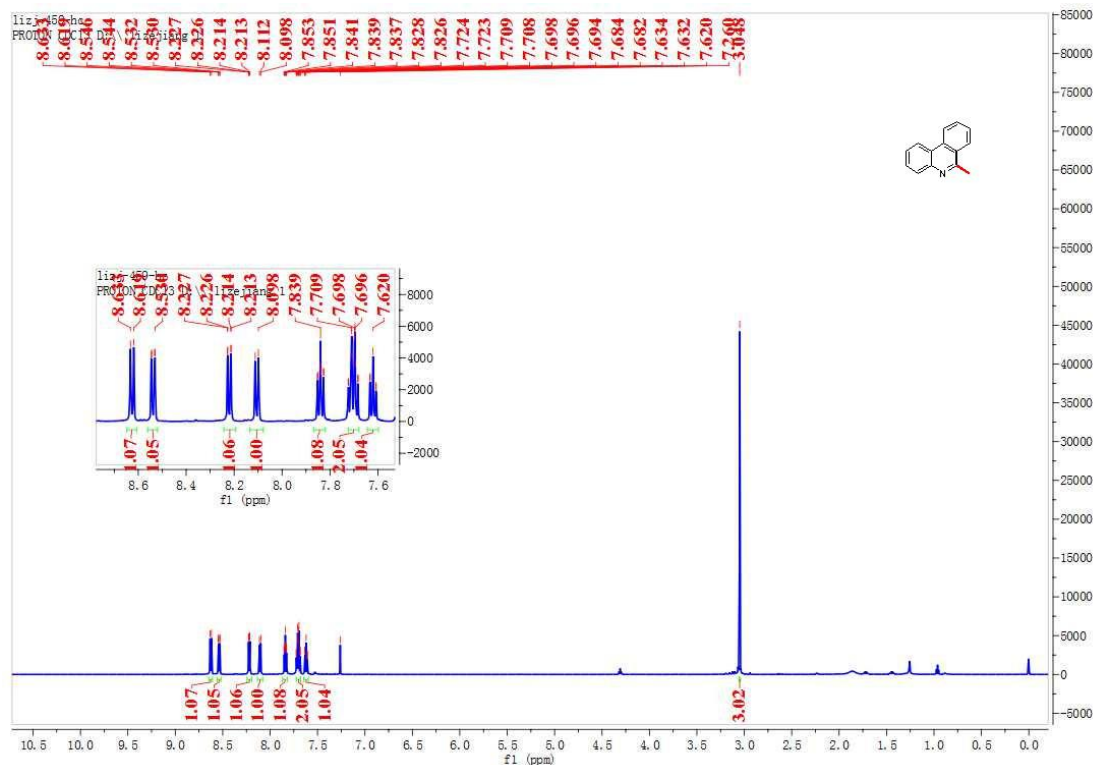

## $^{13}\text{C}$ NMR

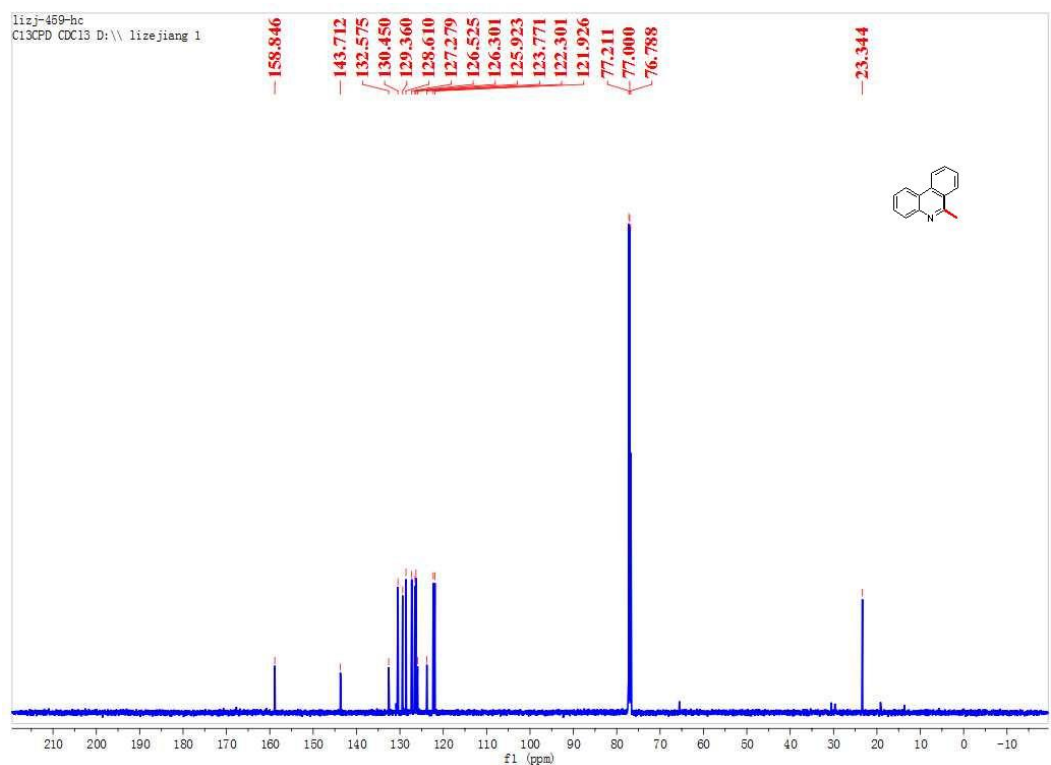

## 2-<sup>1</sup>H NMR

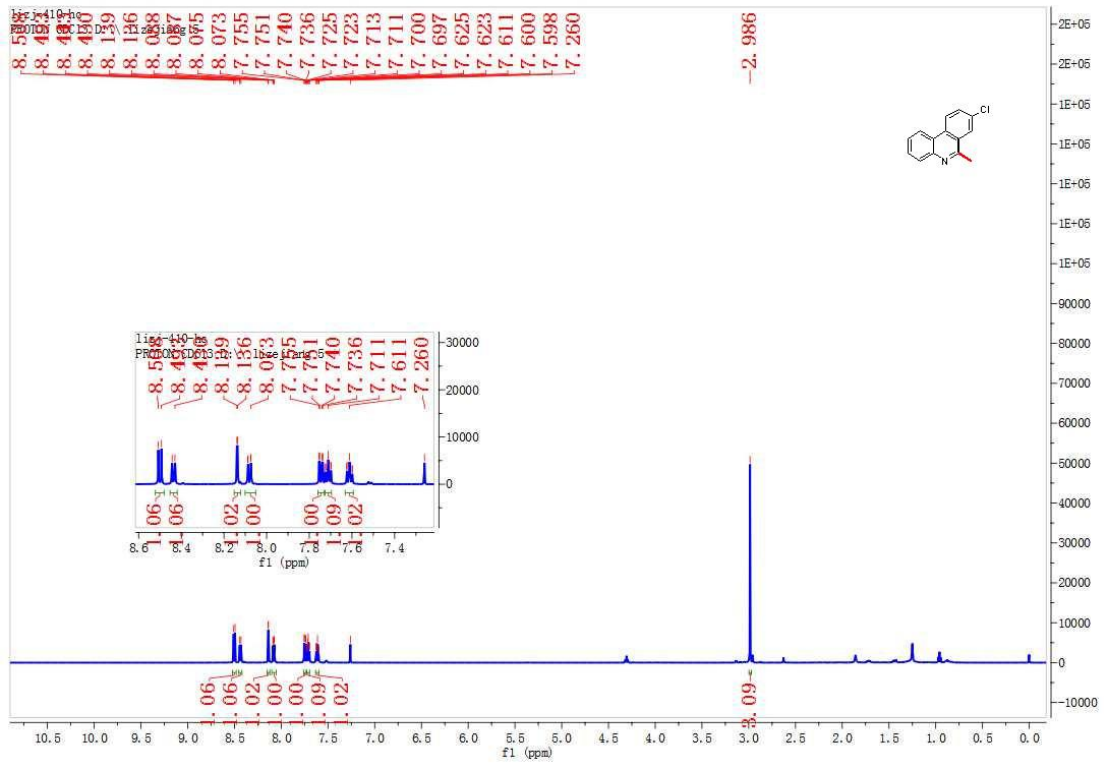

## 2-<sup>13</sup>C NMR

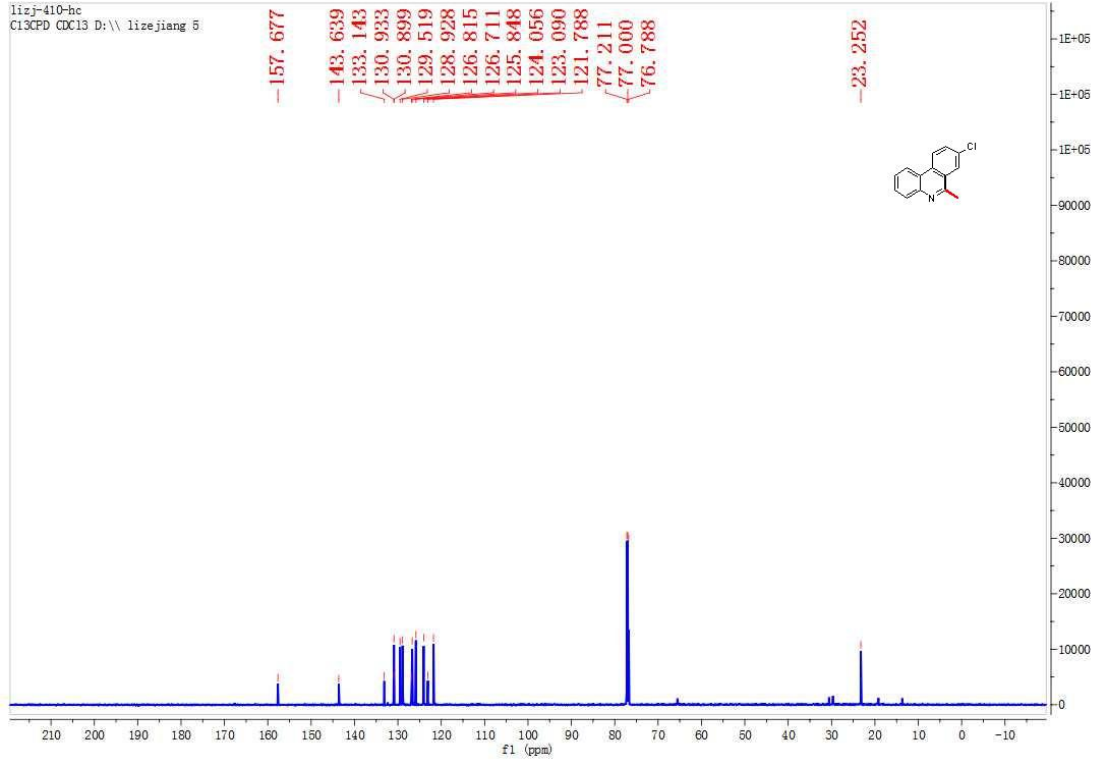



### 3-<sup>1</sup>H NMR

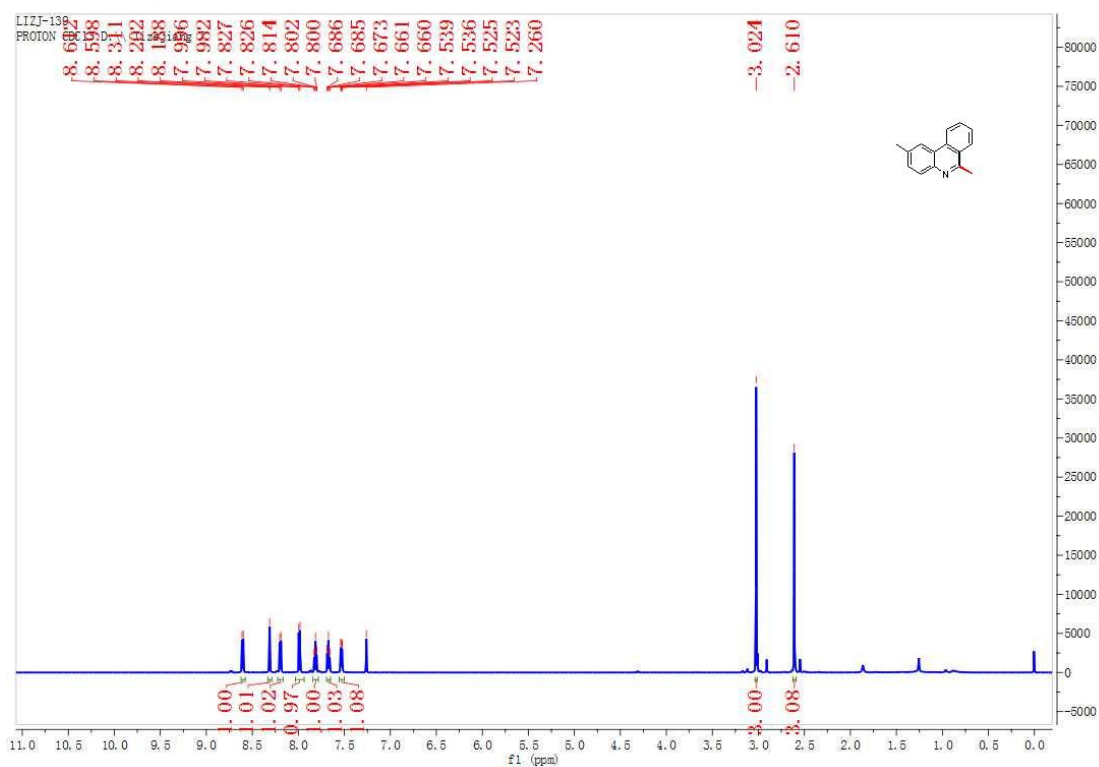

### 3-<sup>13</sup>C NMR

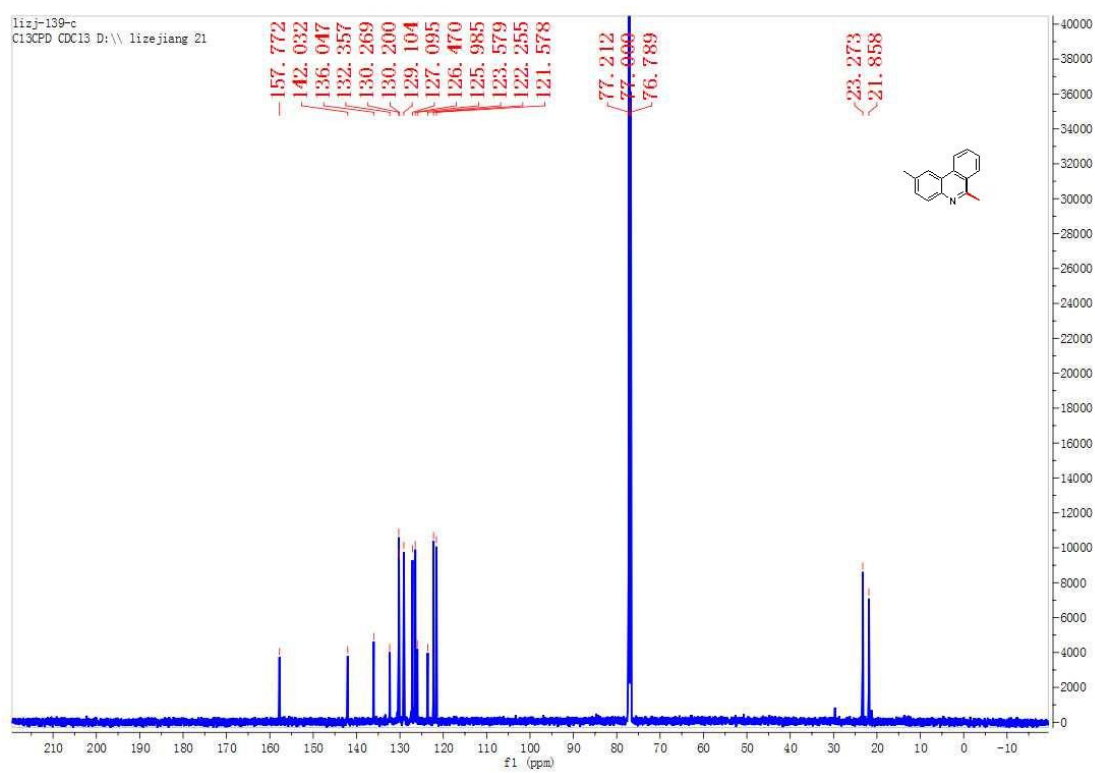

## 4-<sup>1</sup>H NMR

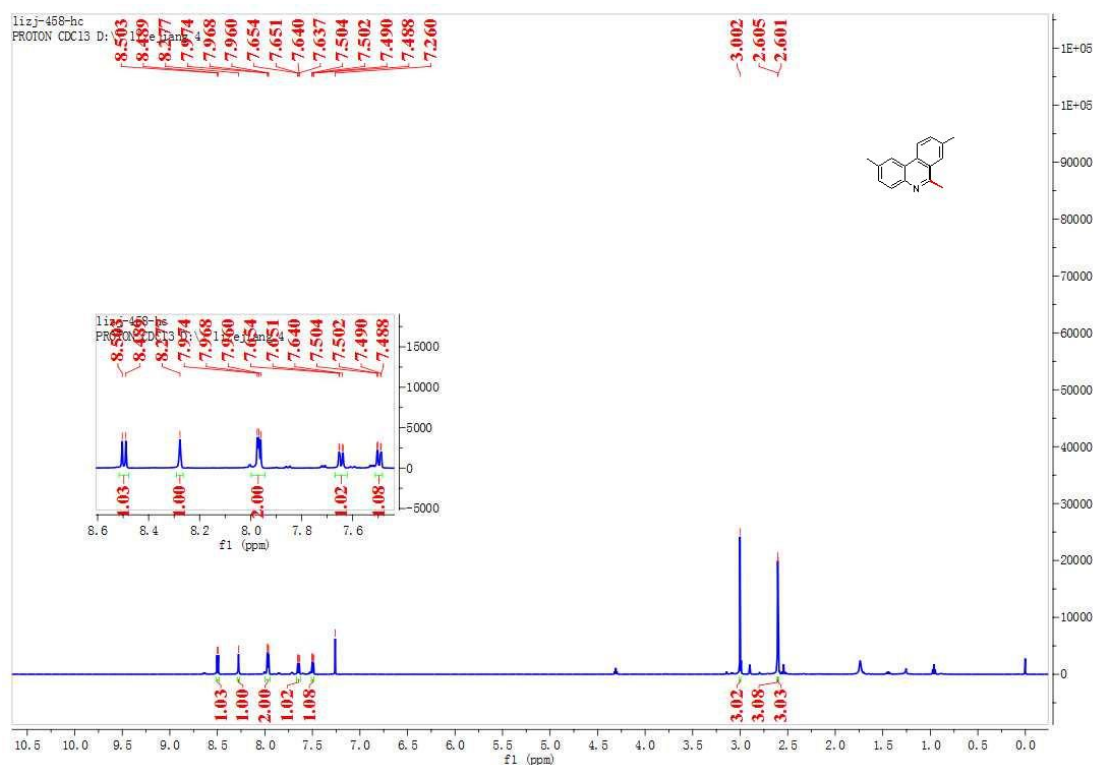

## 4-<sup>13</sup>C NMR

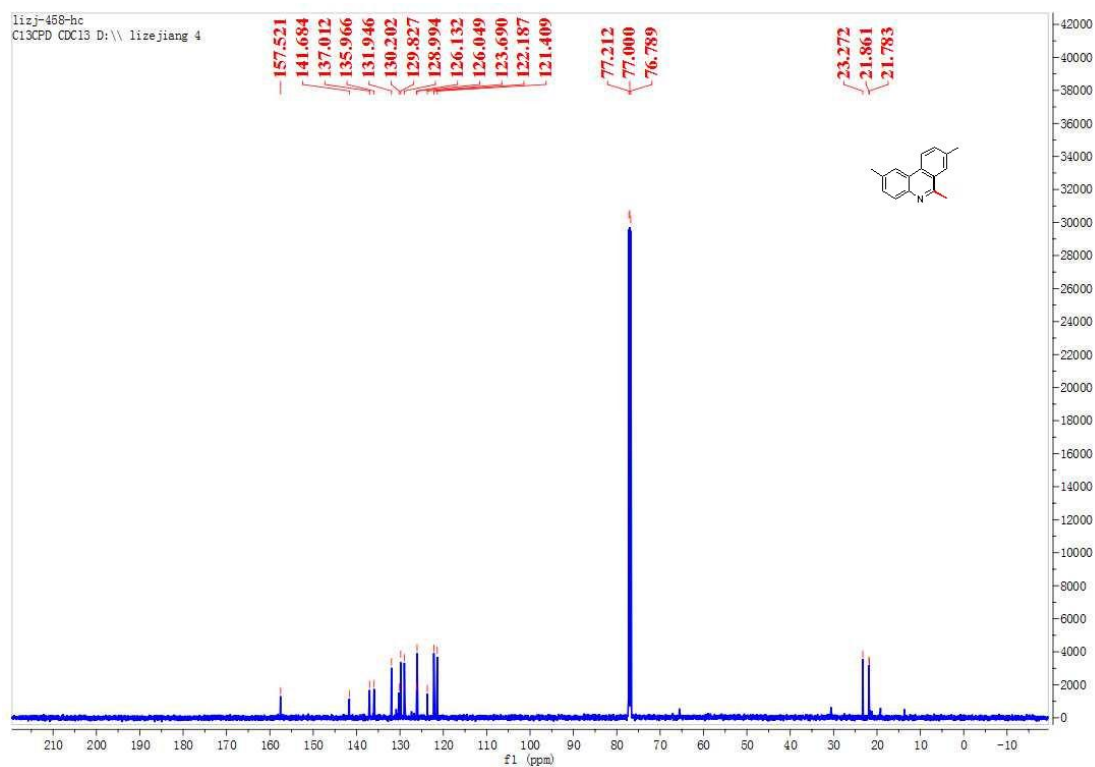

## 5-<sup>1</sup>H NMR

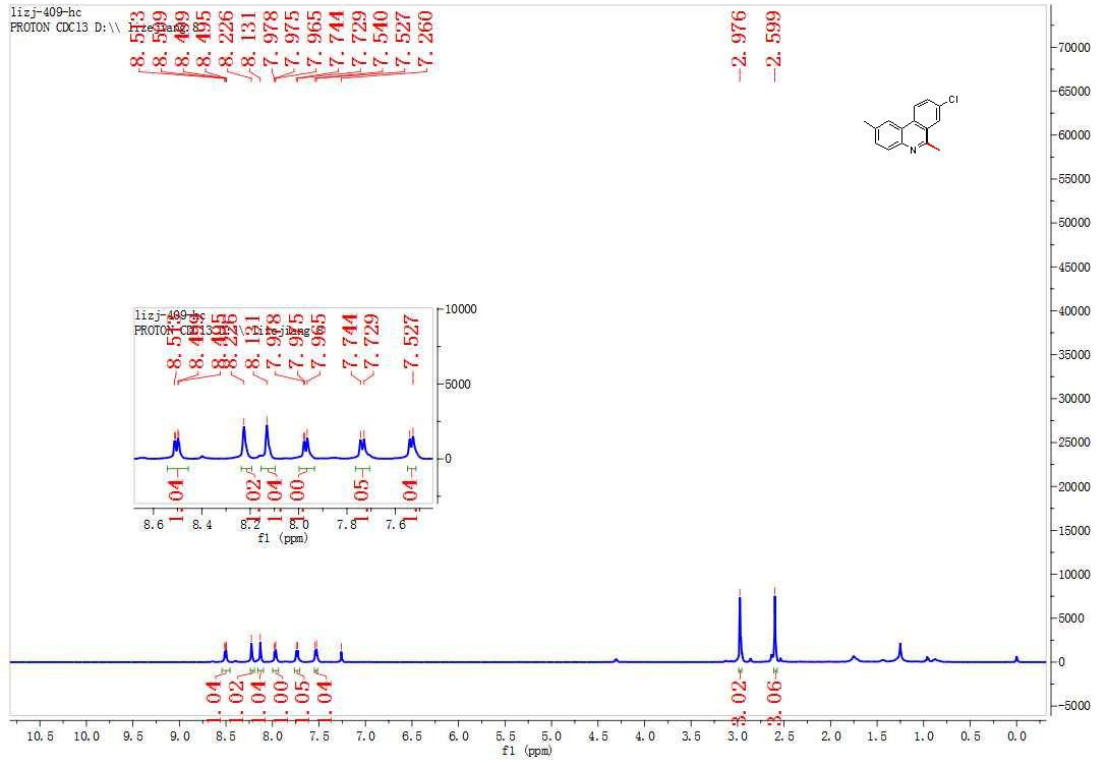

## 5-<sup>13</sup>C NMR

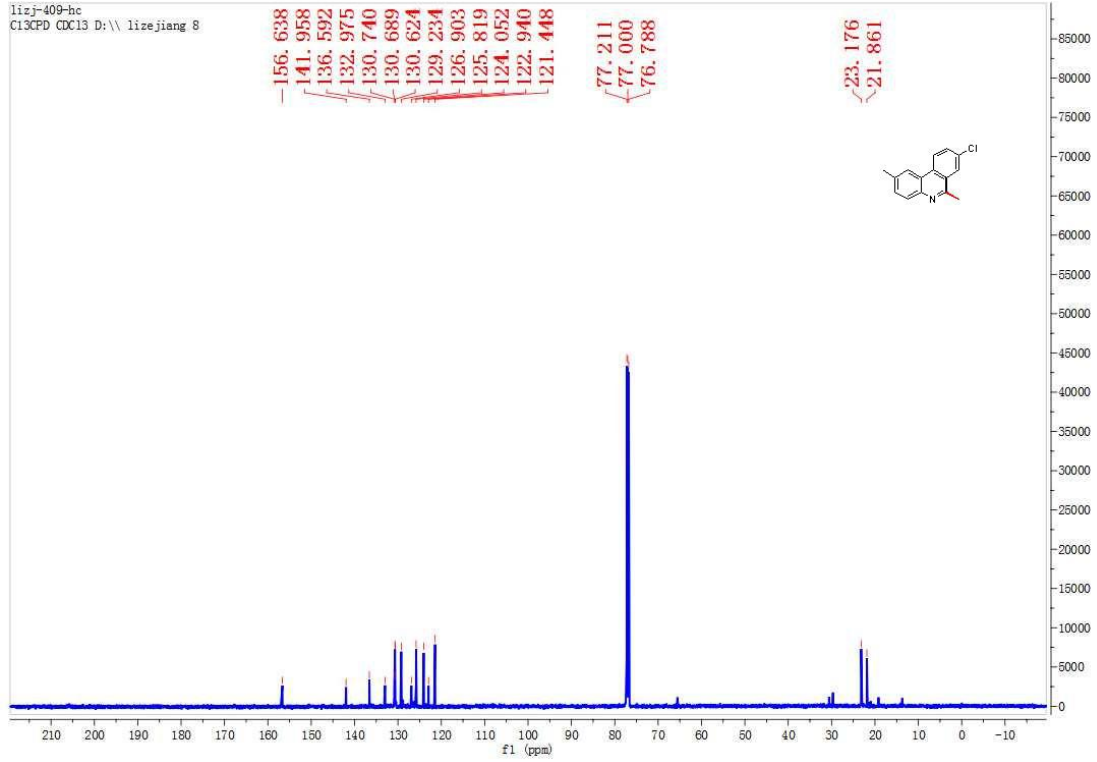

## 6-<sup>1</sup>H NMR

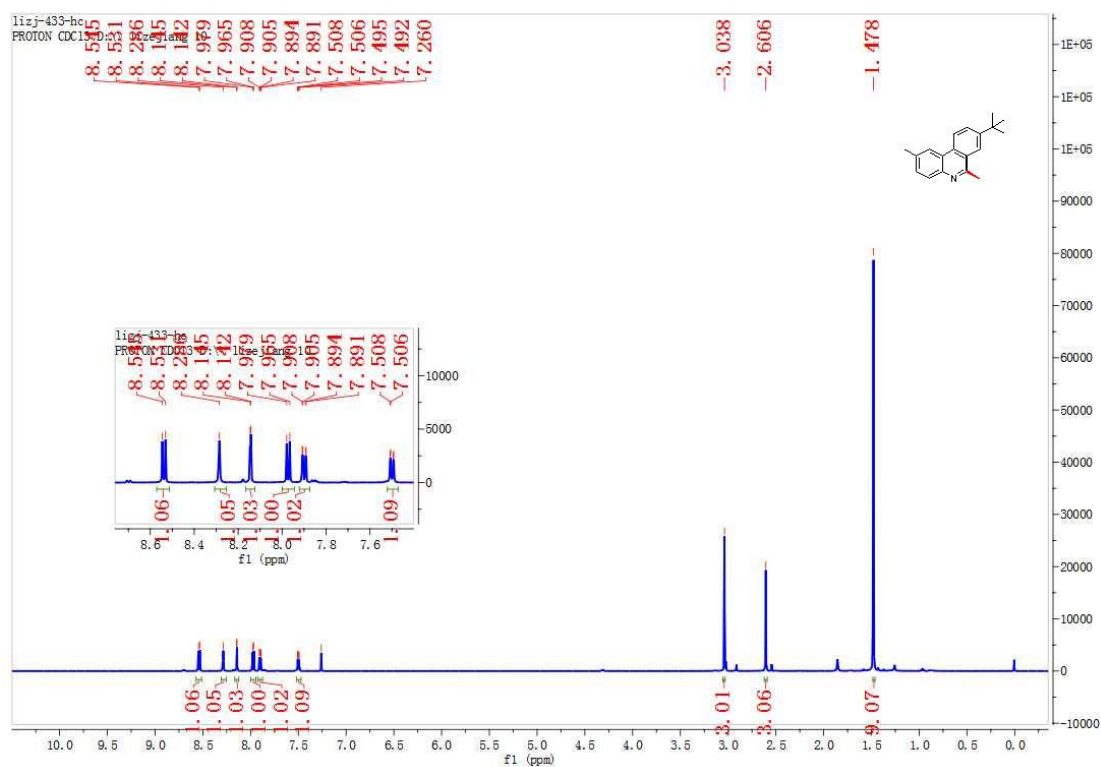

## 6-<sup>13</sup>C NMR

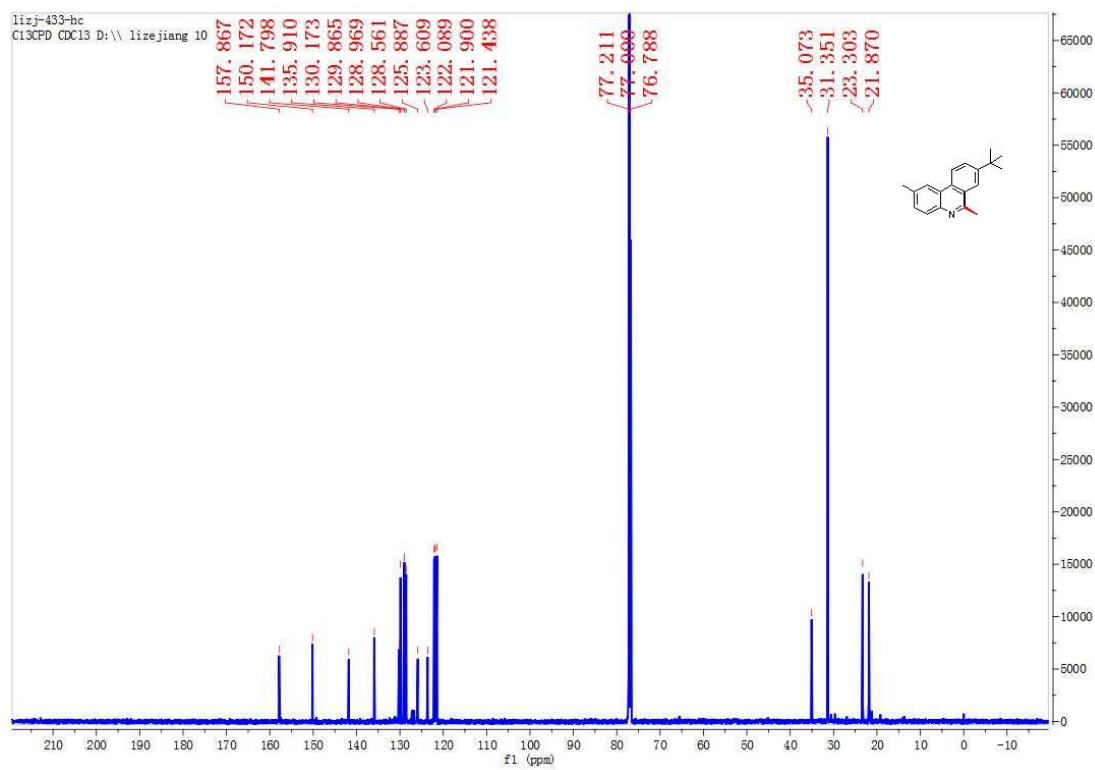

## 7-<sup>1</sup>H NMR

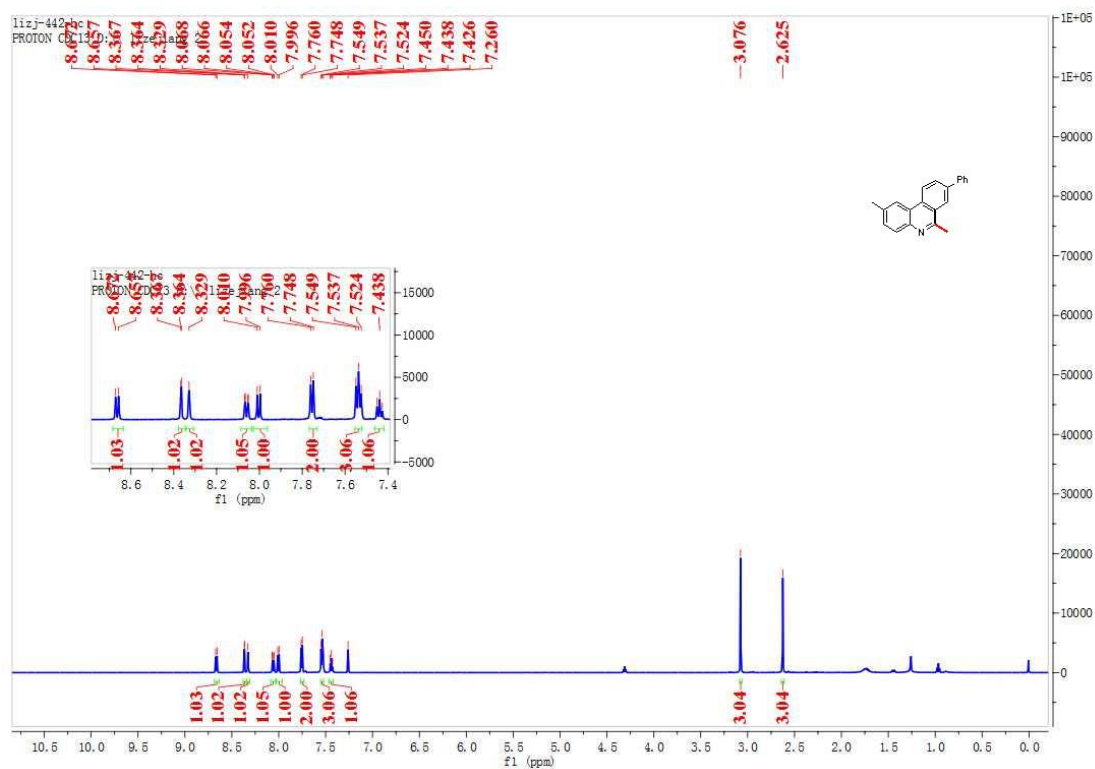

## 7-<sup>13</sup>C NMR

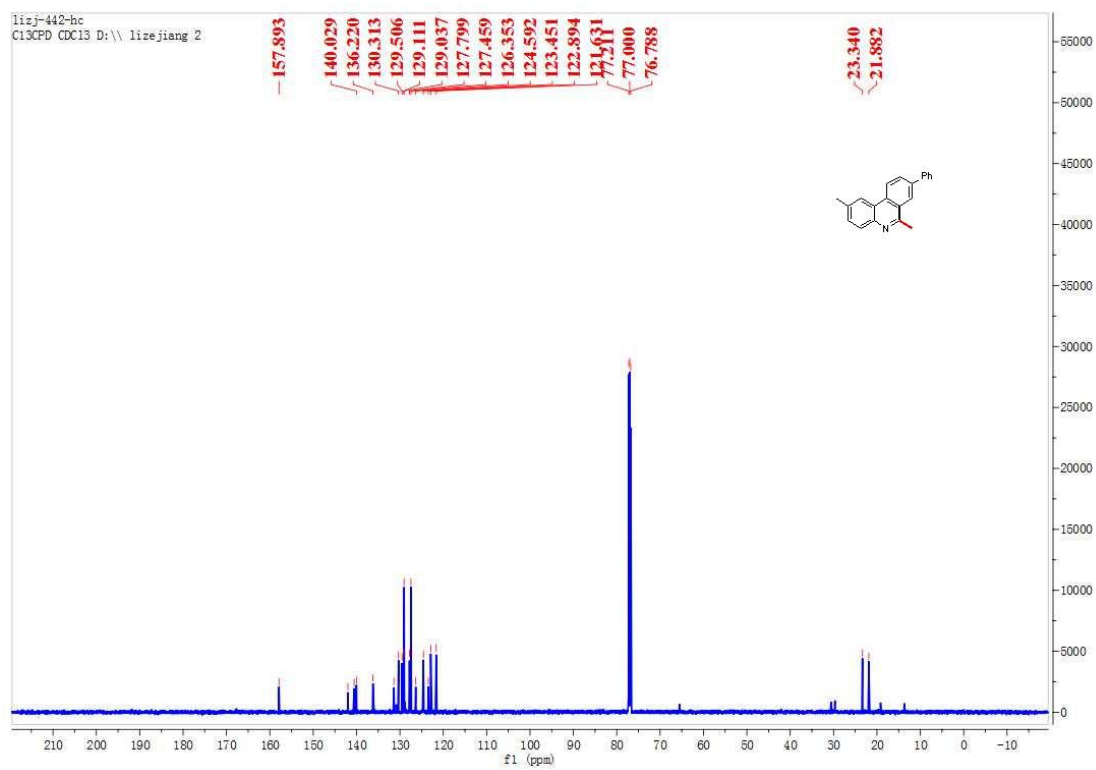

## 8-<sup>1</sup>H NMR

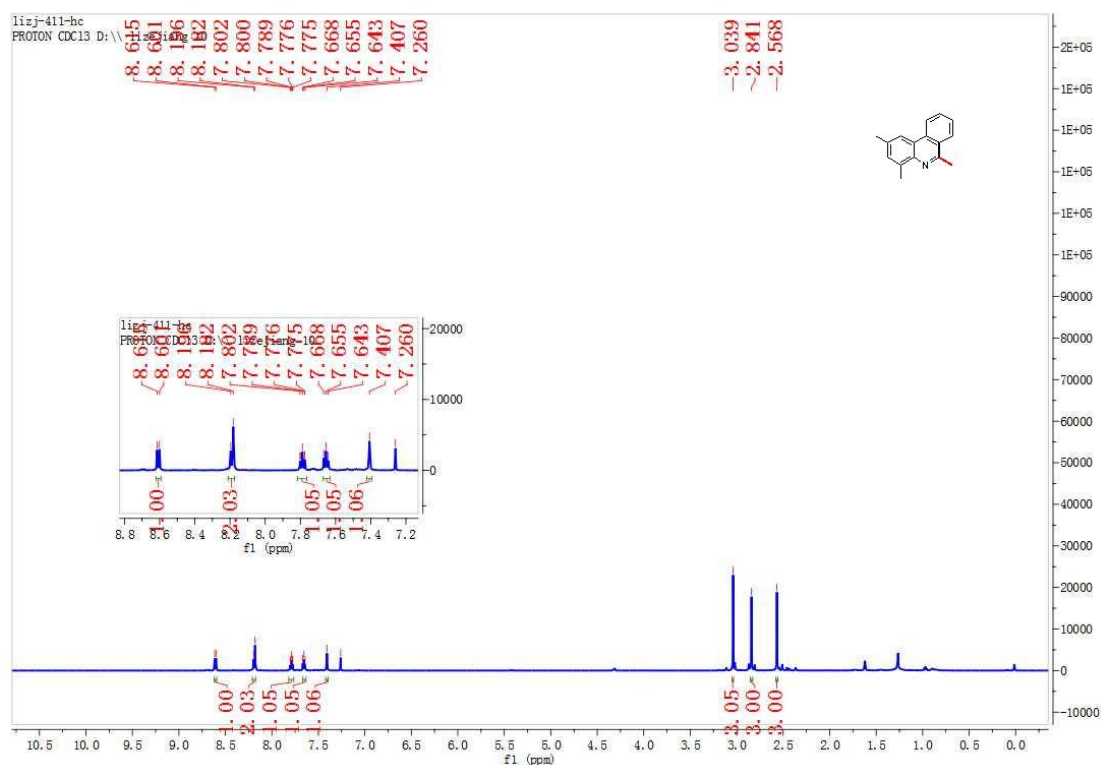

## 8-<sup>13</sup>C NMR

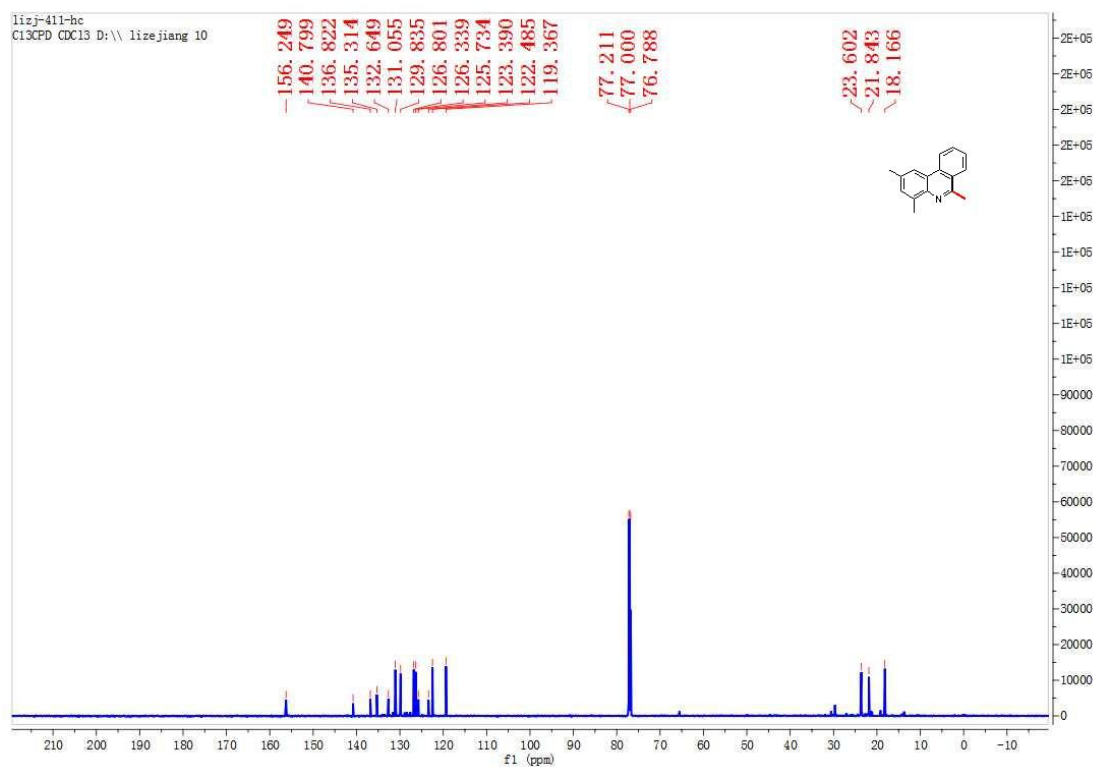

## 9-<sup>1</sup>H NMR

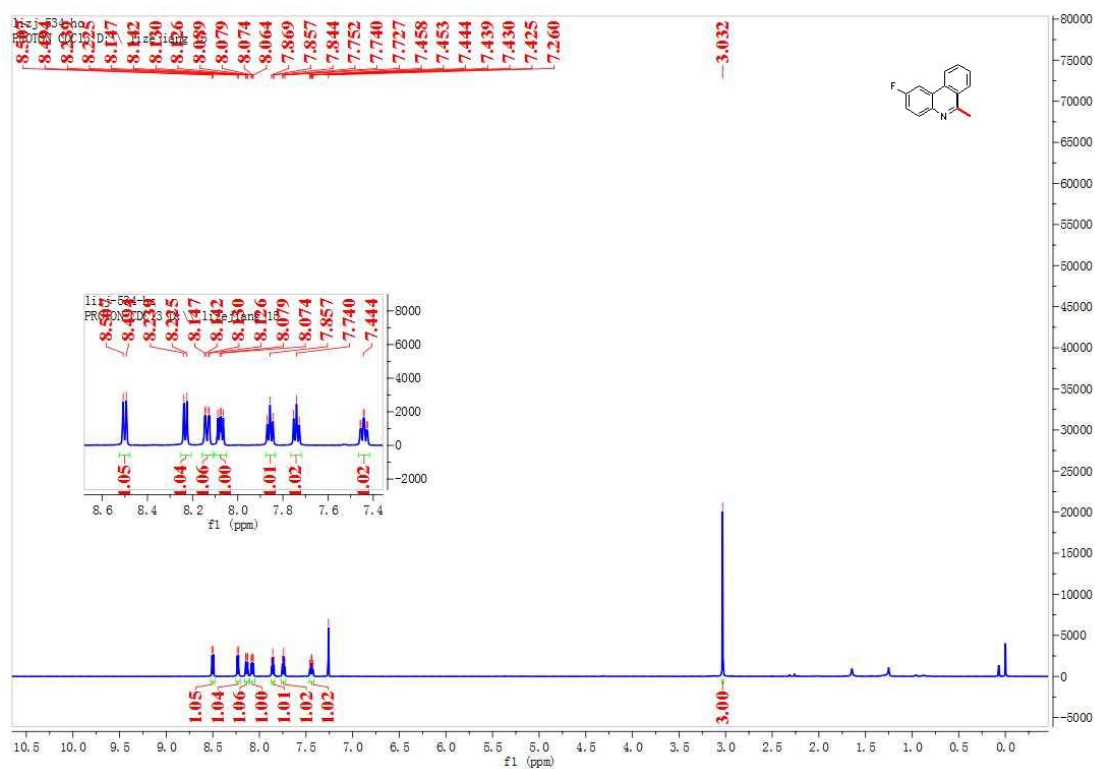

## 9-<sup>13</sup>C NMR

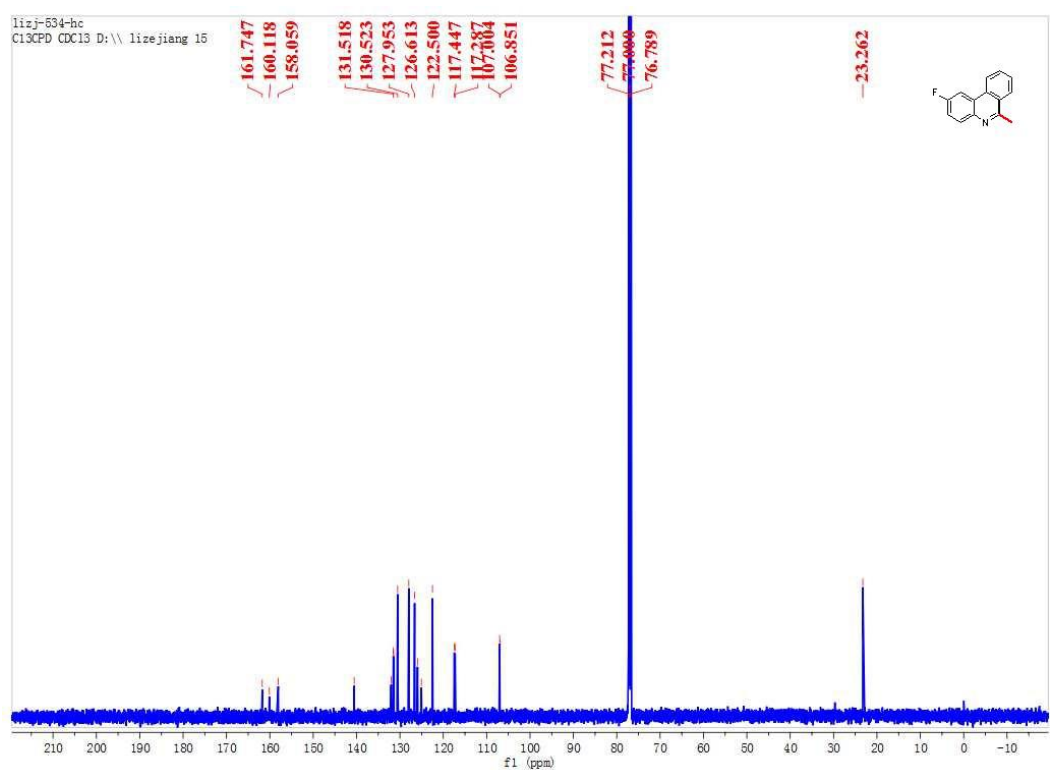

## 10-<sup>1</sup>H NMR

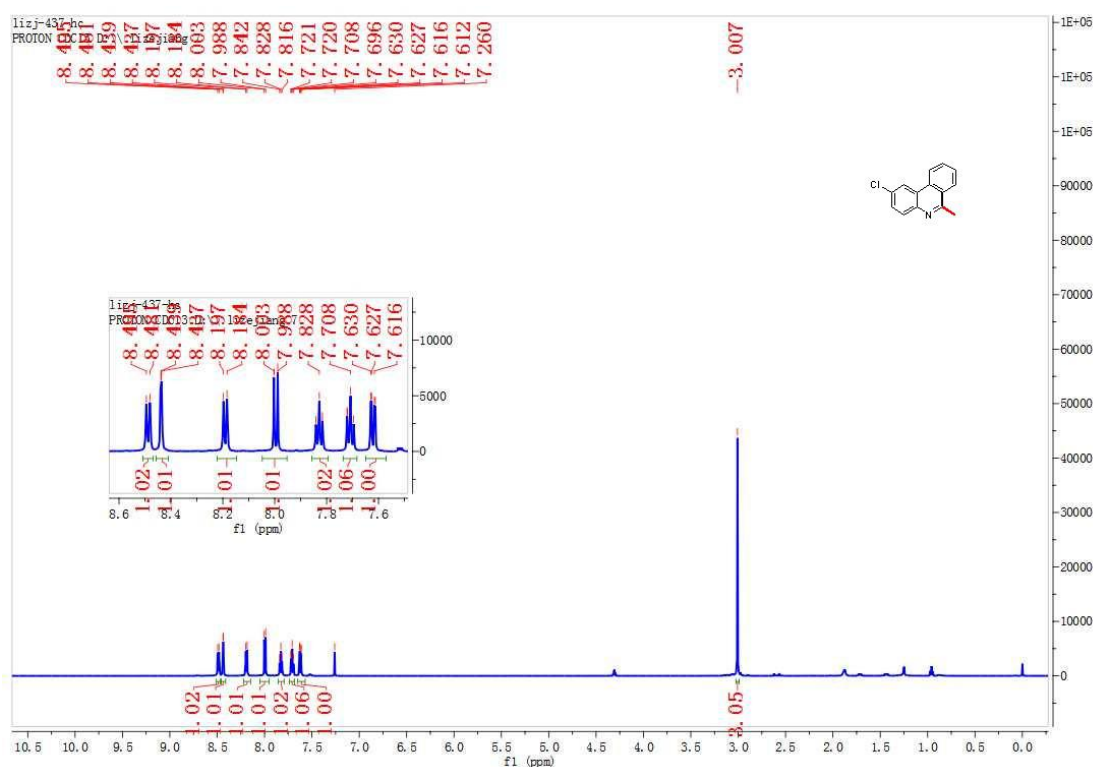

## 10-<sup>13</sup>C NMR

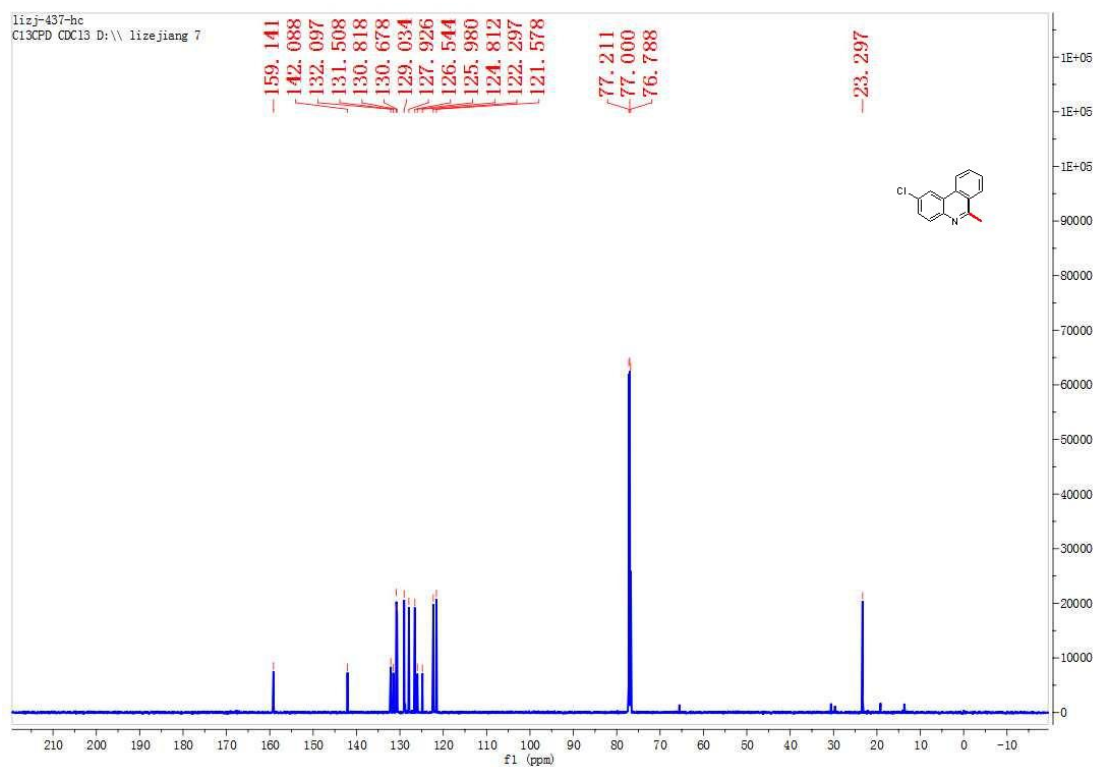



### 13-<sup>1</sup>H NMR

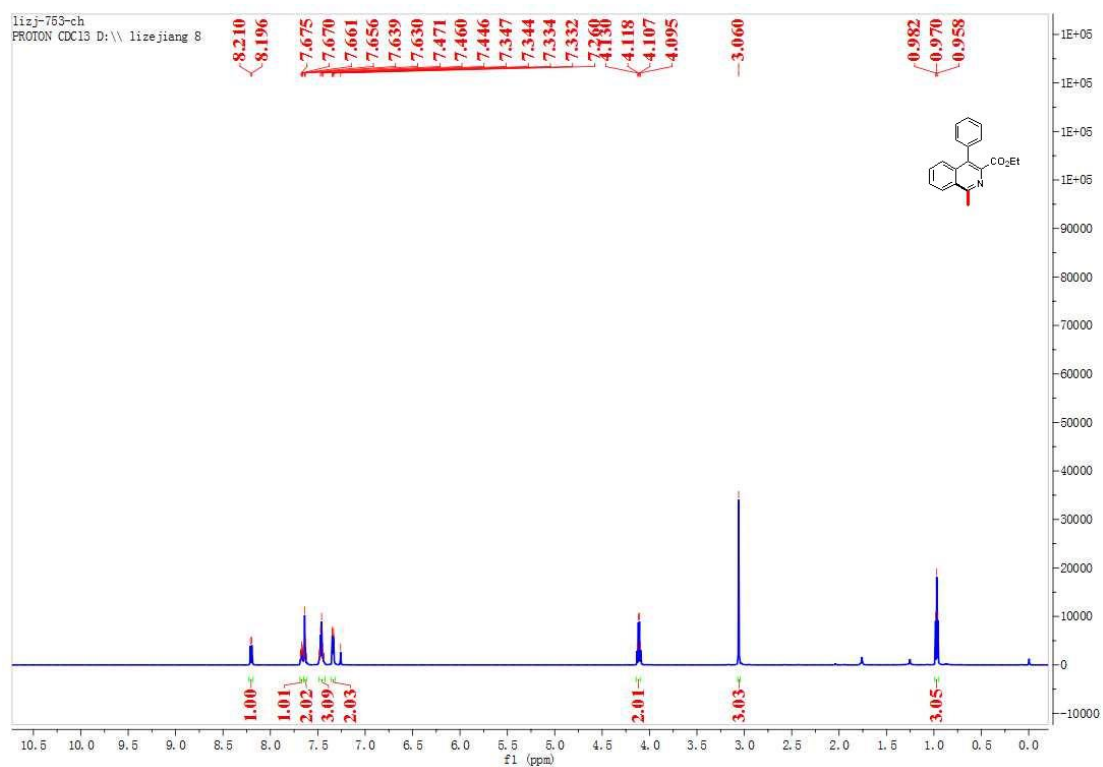

### 13-<sup>13</sup>C NMR

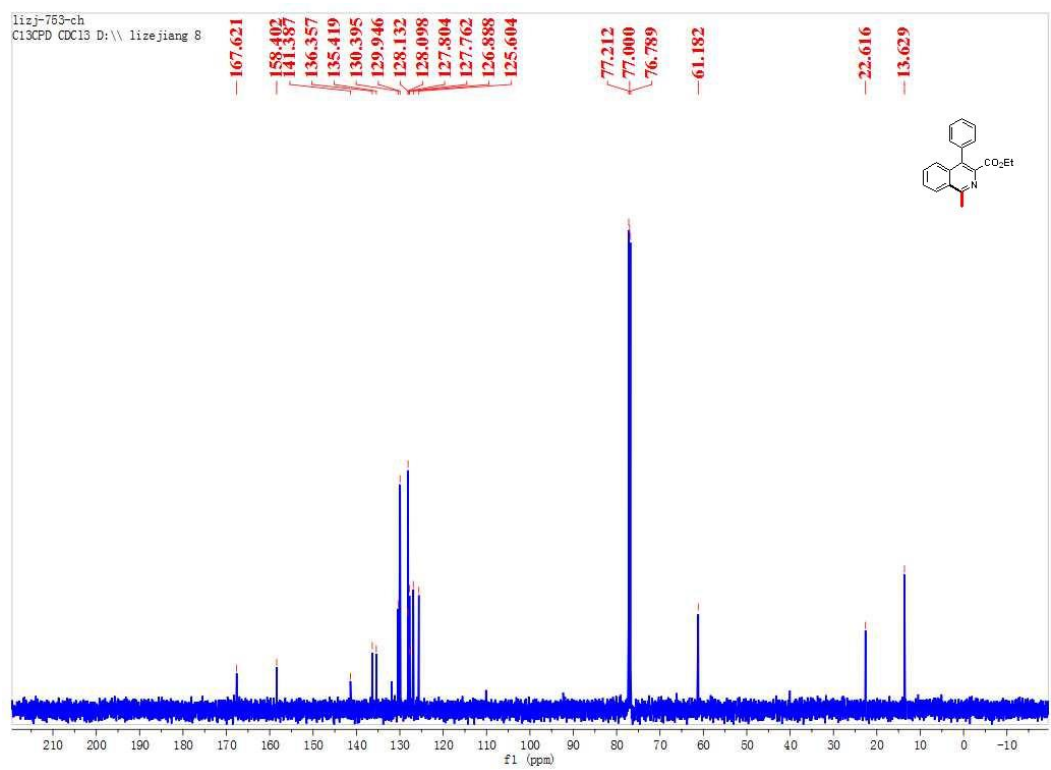

# 14-<sup>1</sup>H NMR

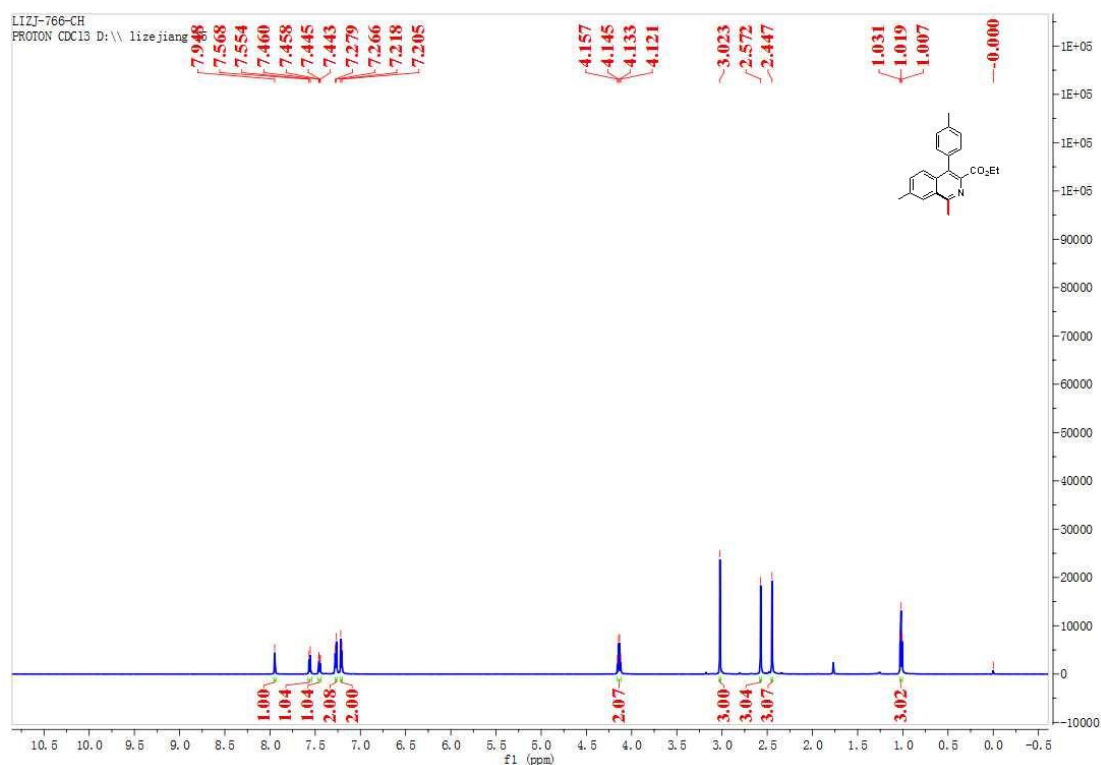

# 14-<sup>13</sup>C NMR

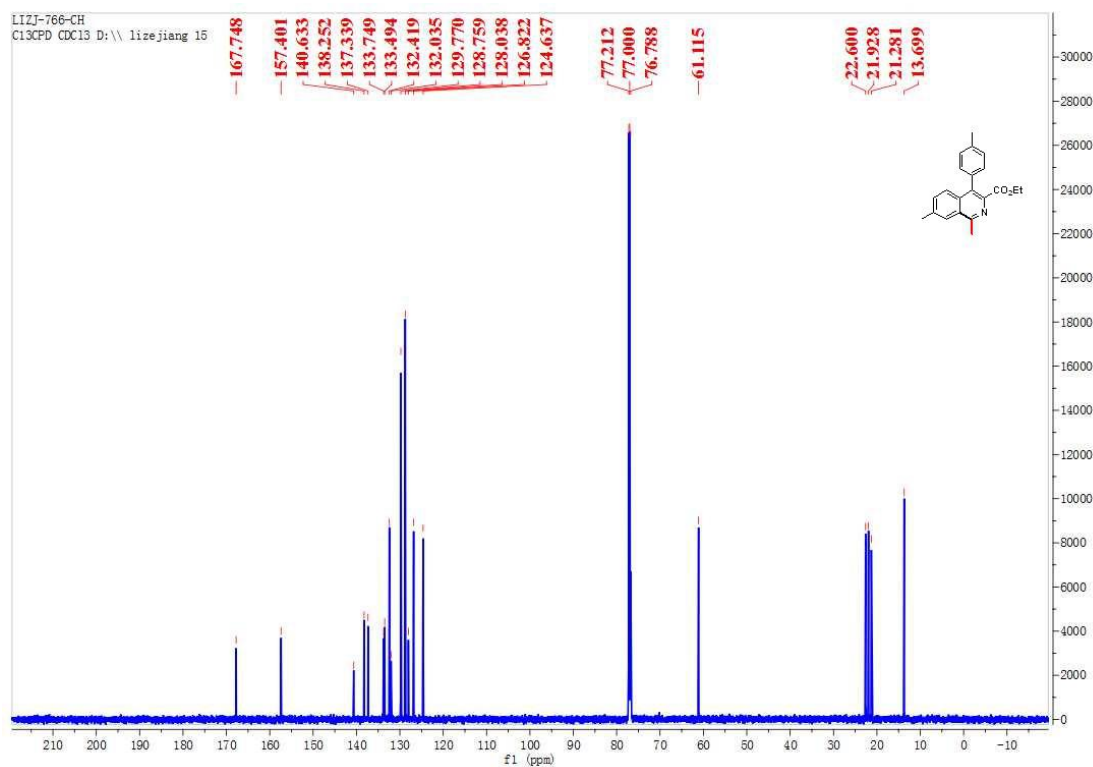

### 15-<sup>1</sup>H NMR

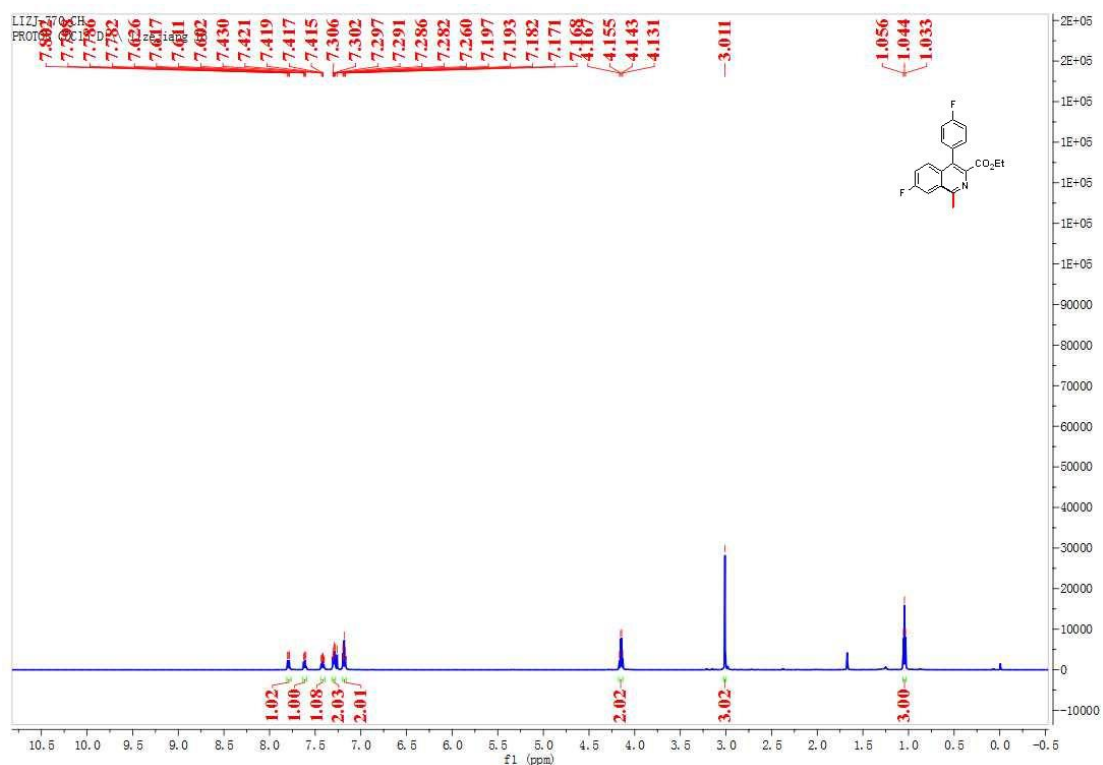

### 15-<sup>13</sup>C NMR

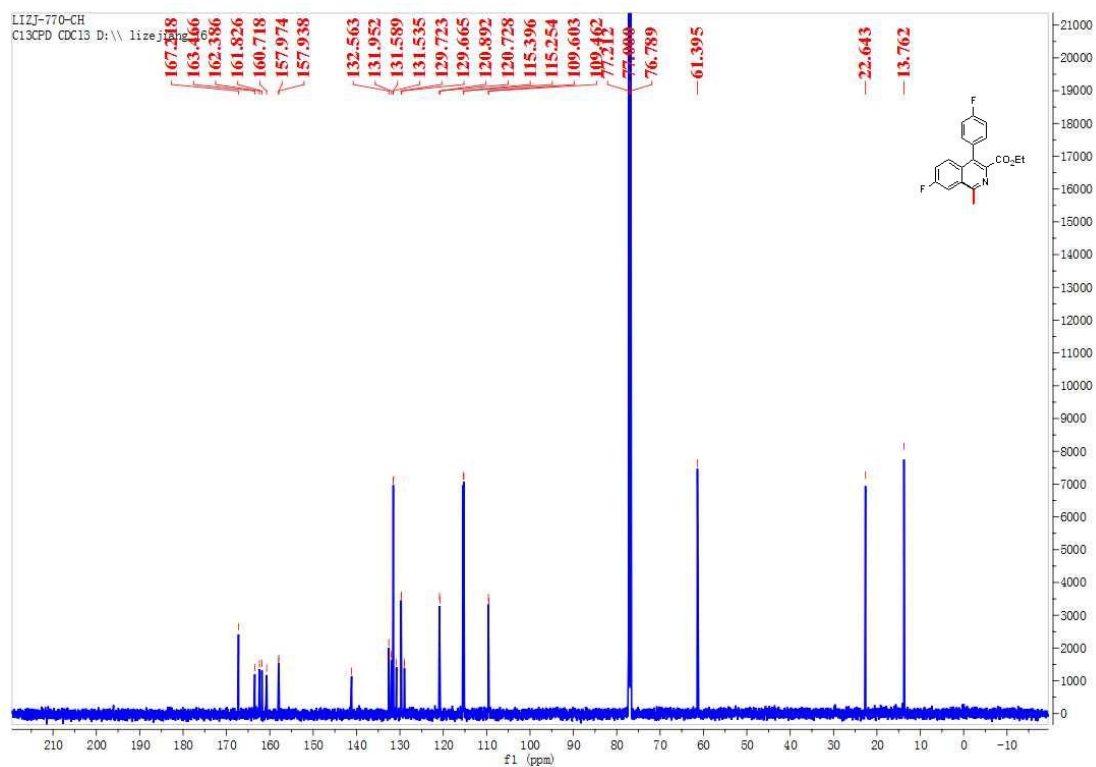

## 16-<sup>1</sup>H NMR

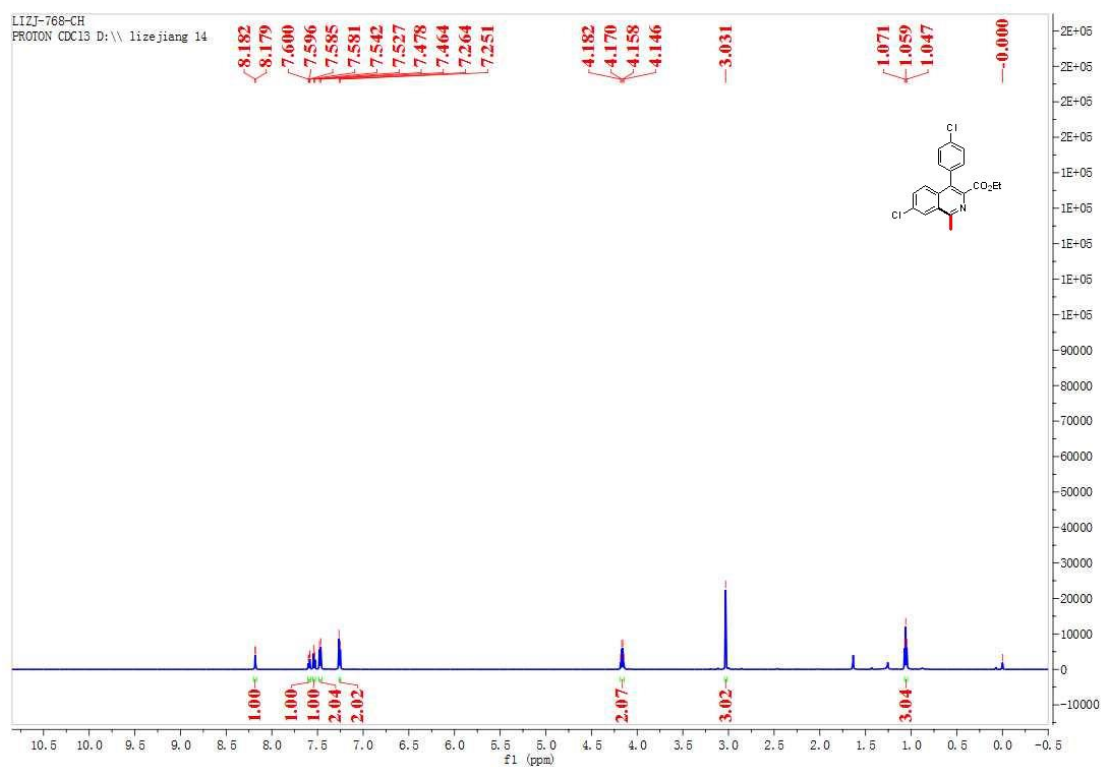

## 16-<sup>13</sup>C NMR

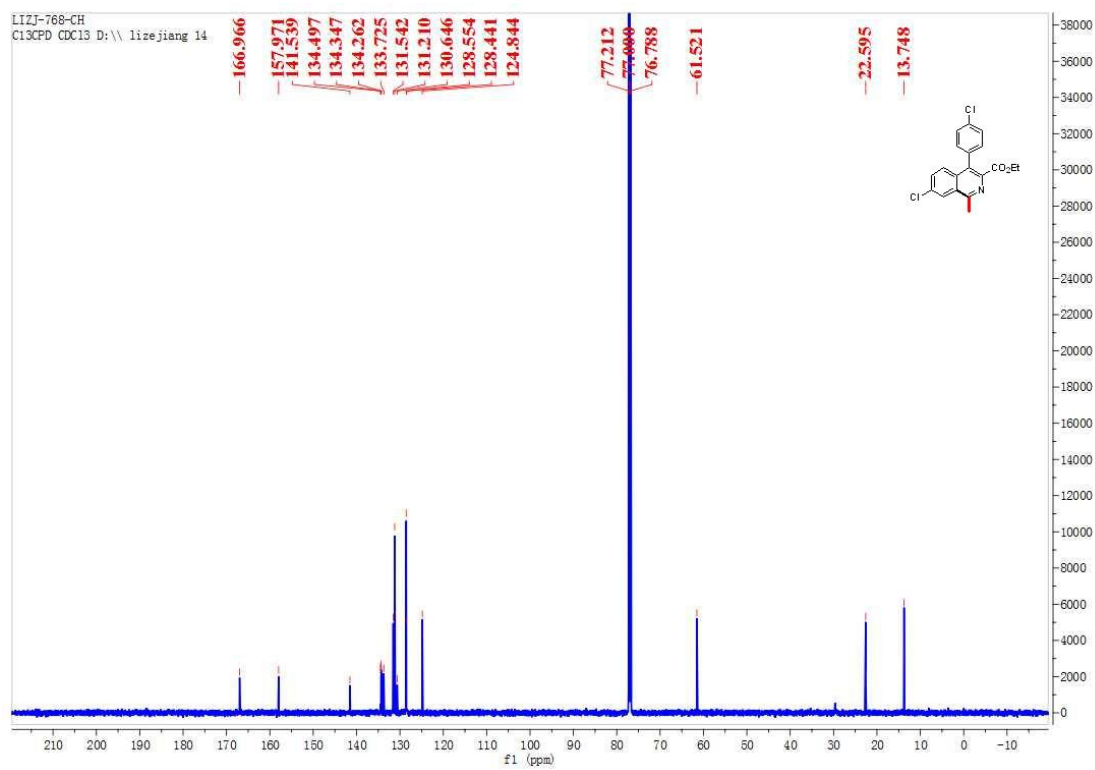

# 17-<sup>1</sup>H NMR

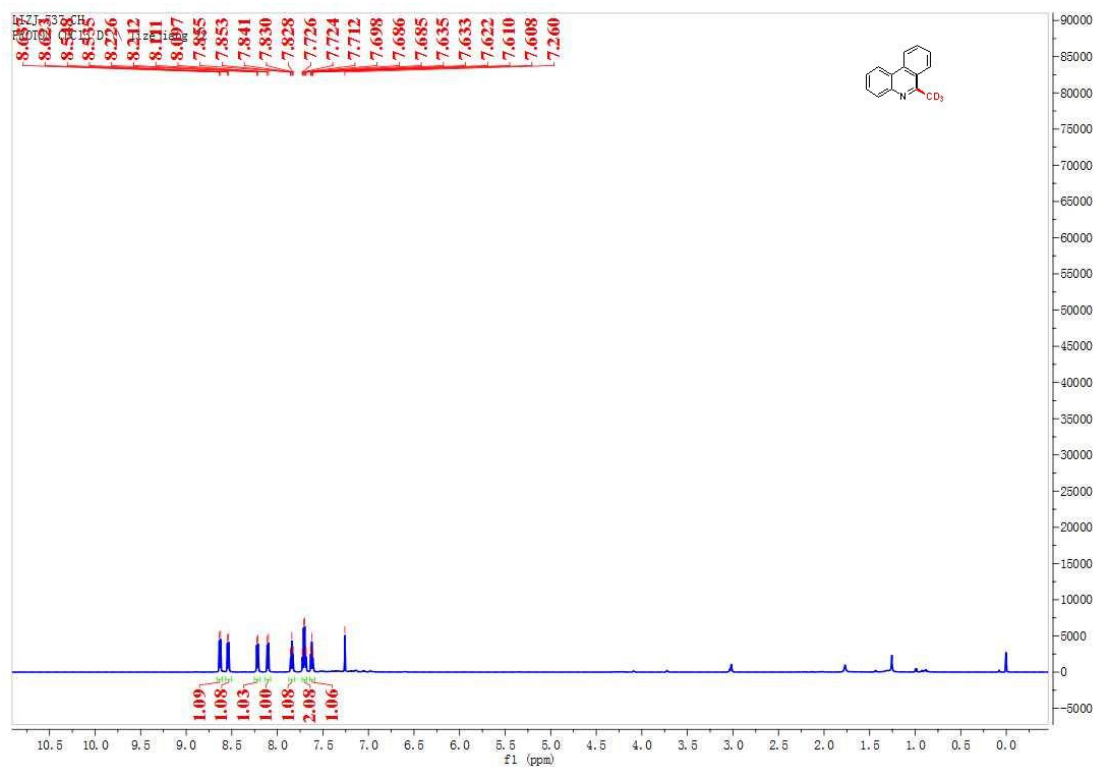

# 17-<sup>13</sup>C NMR

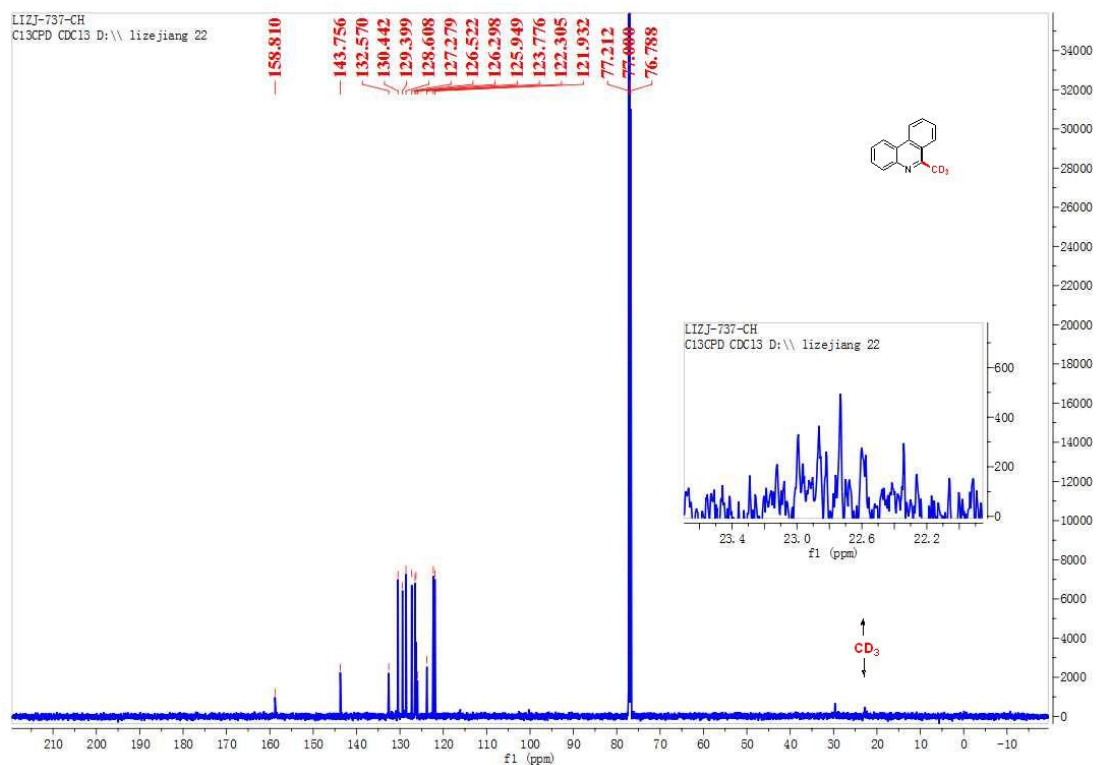

# 18-<sup>1</sup>H NMR

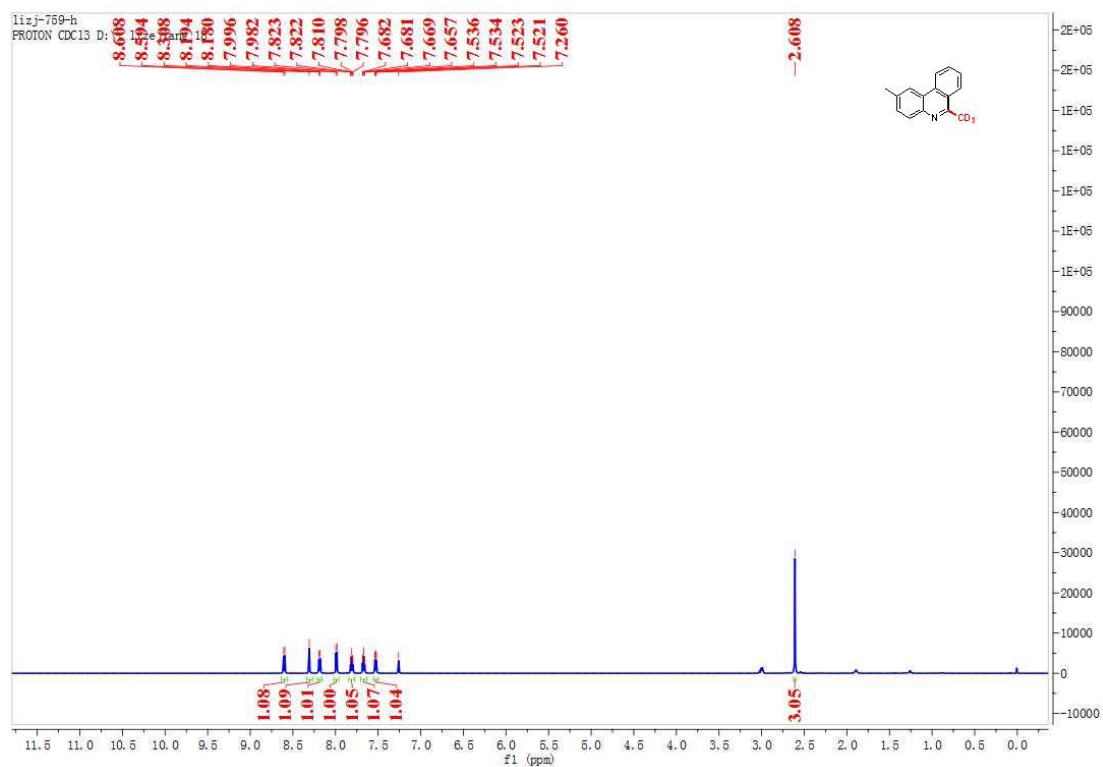

# 18-<sup>13</sup>C NMR

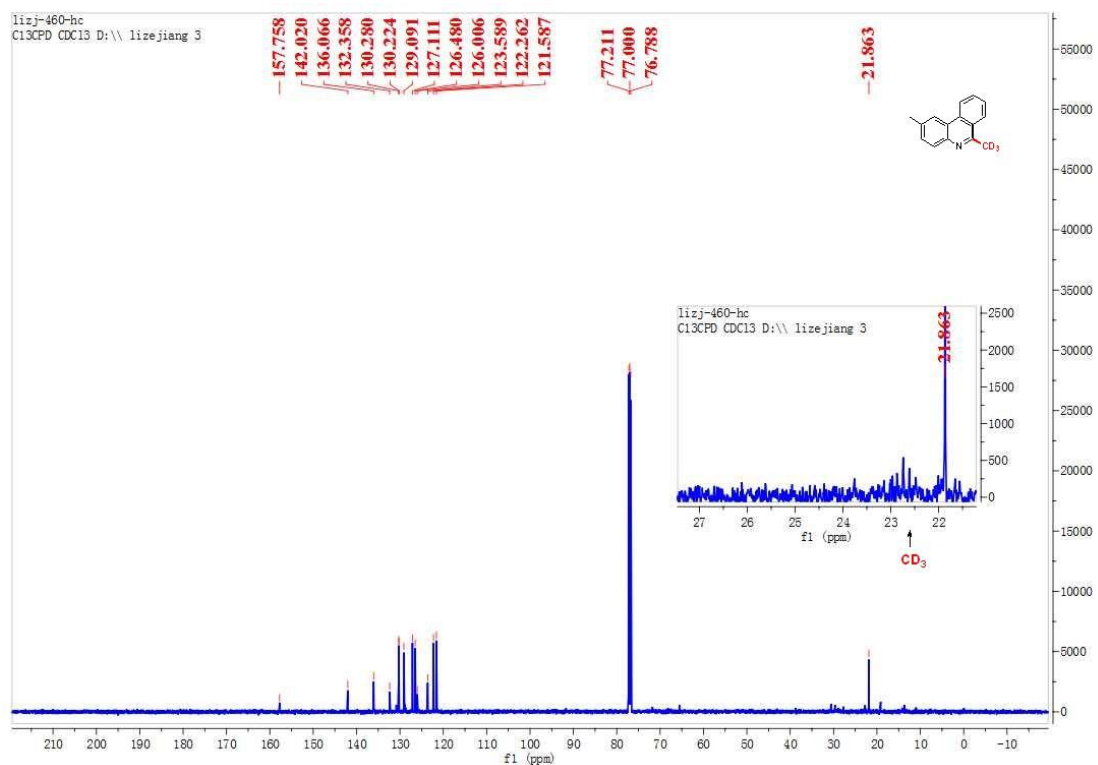

# 19-<sup>1</sup>H NMR

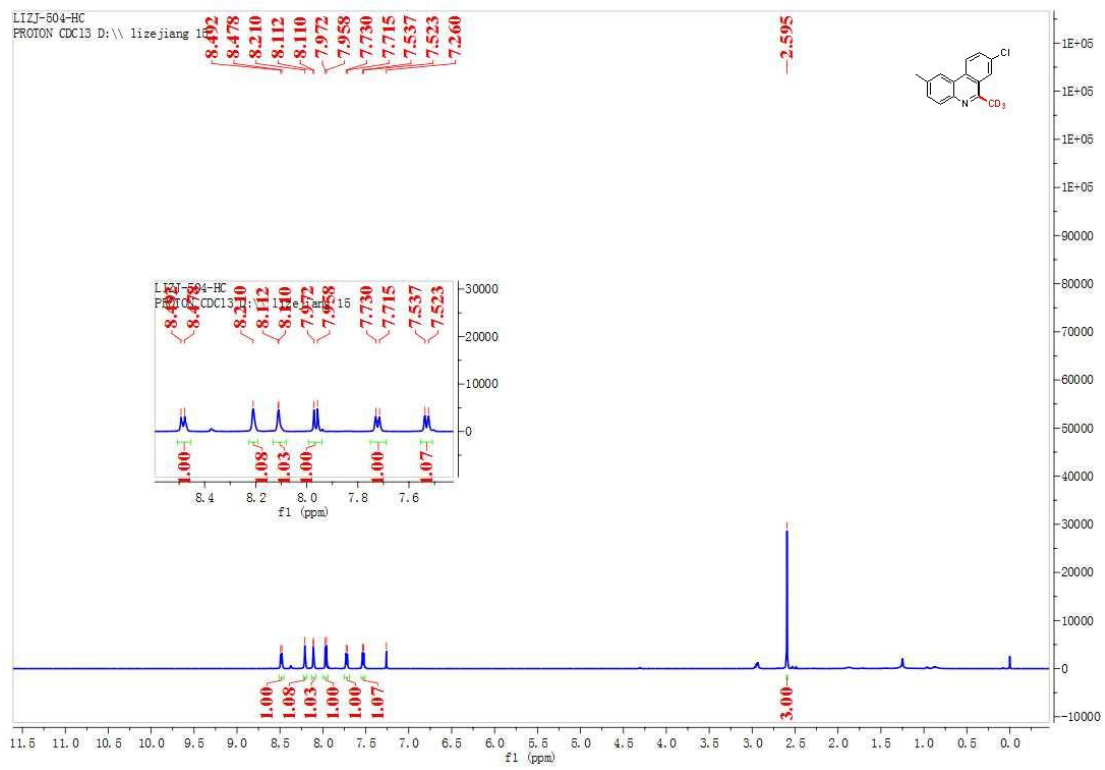

# 19-<sup>13</sup>C NMR

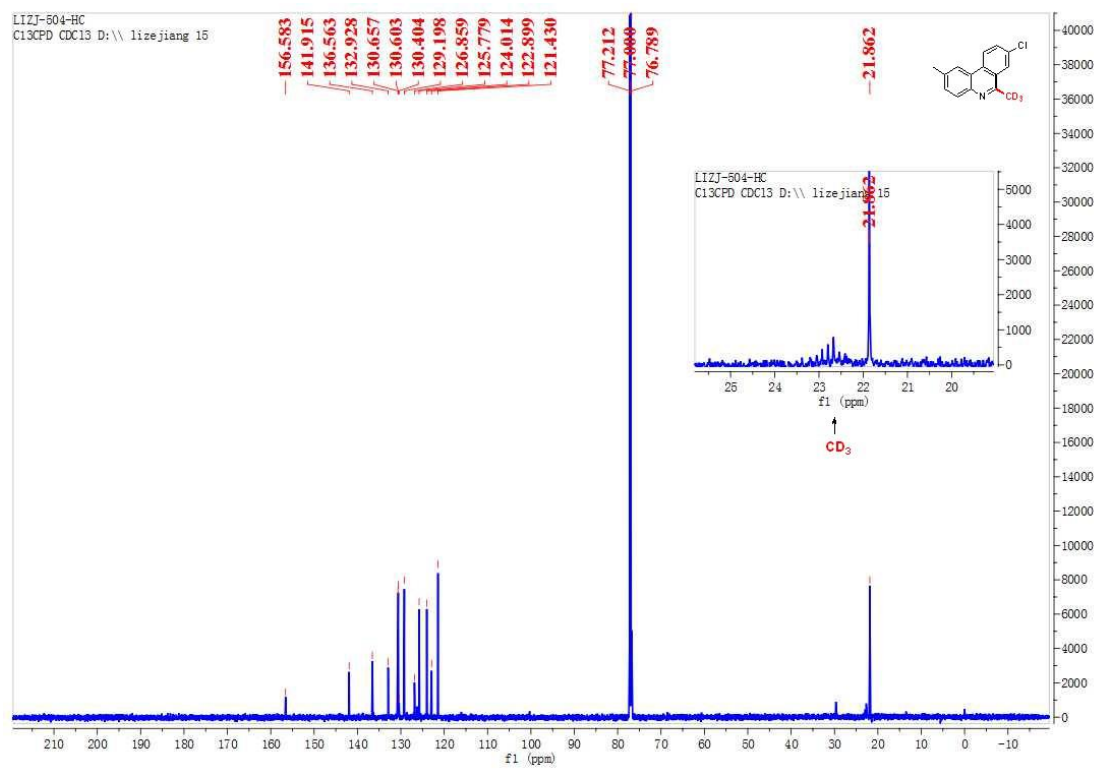

## 20-<sup>1</sup>H NMR

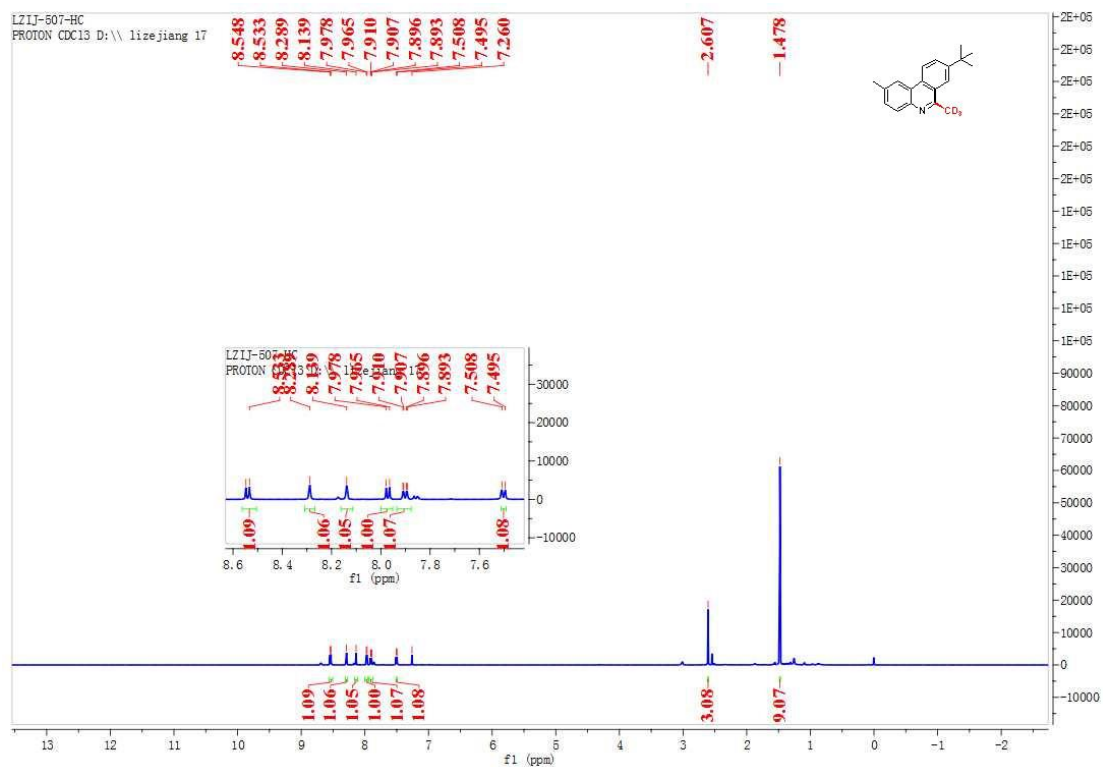

## 20-<sup>13</sup>C NMR

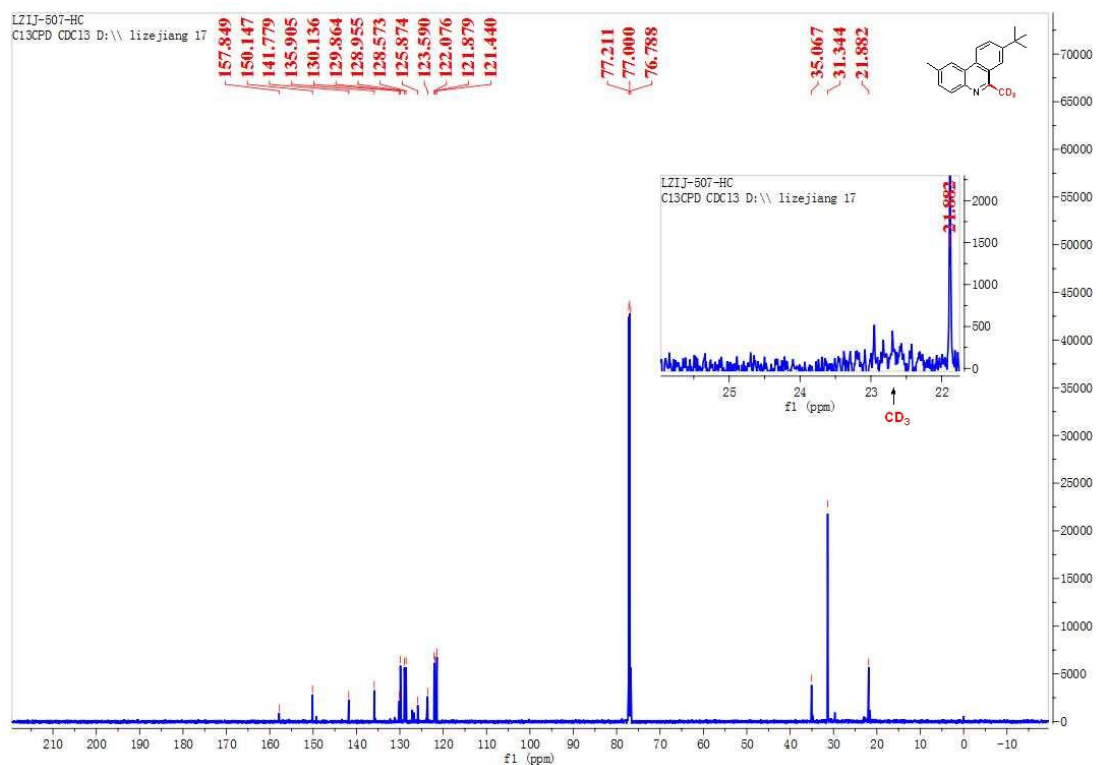



## 21-<sup>1</sup>H NMR

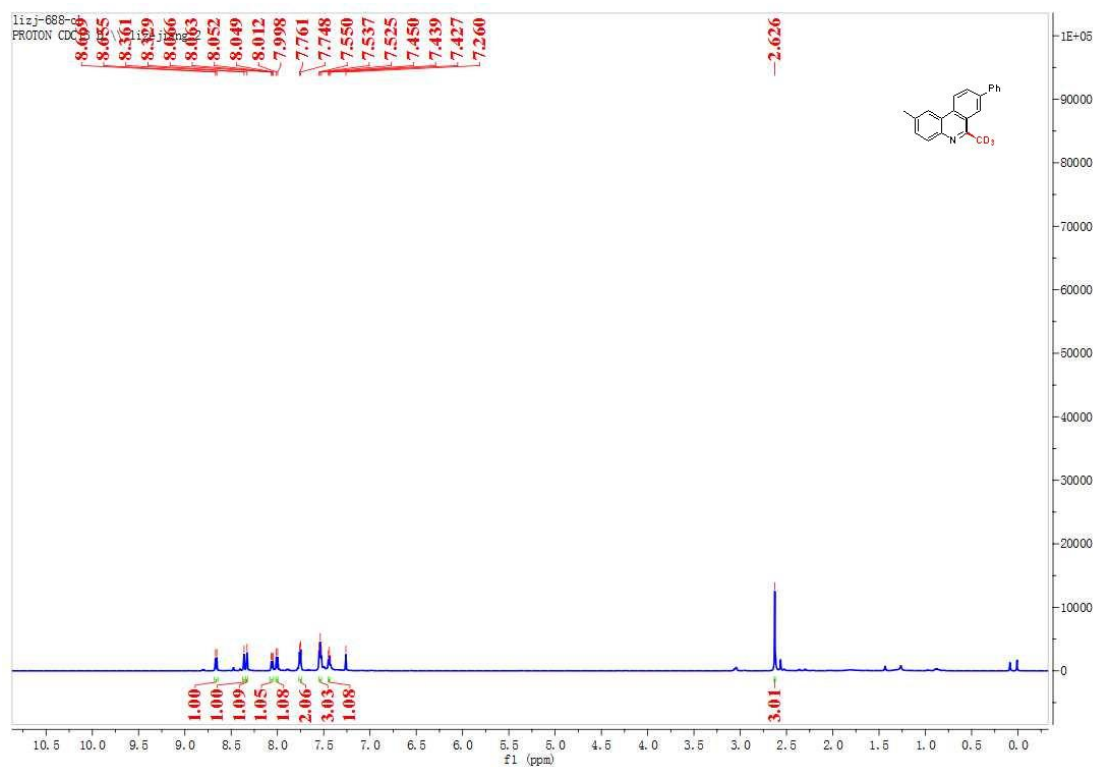

## 21-<sup>13</sup>C NMR

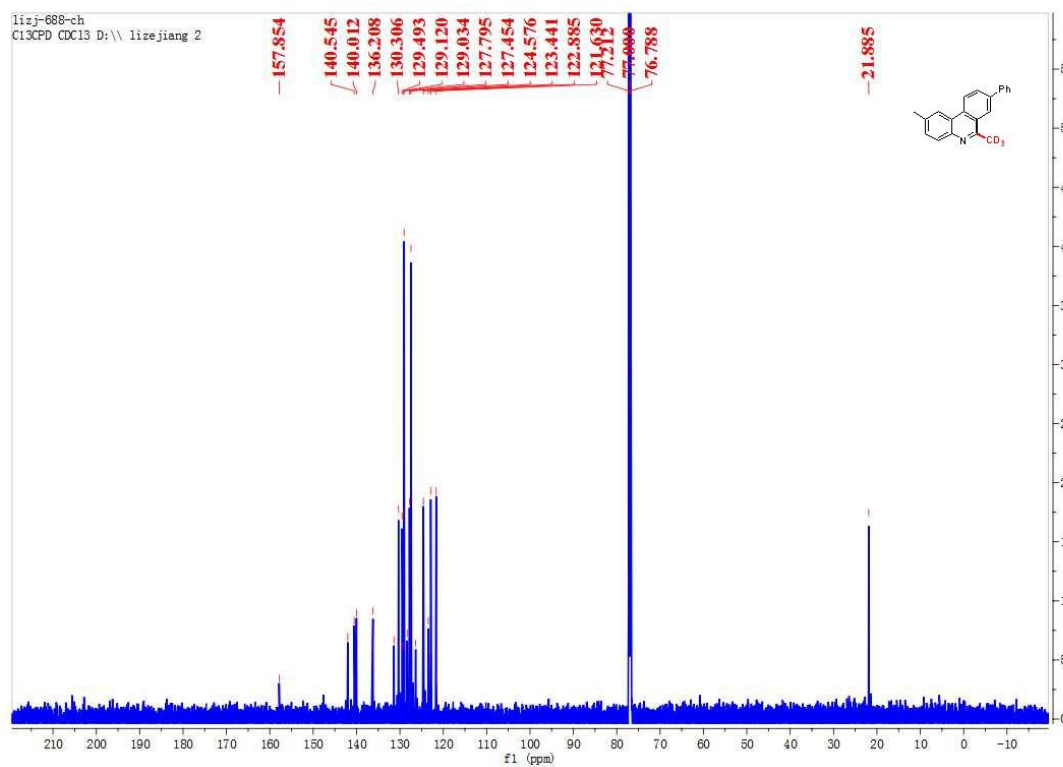

## 22-<sup>1</sup>H NMR

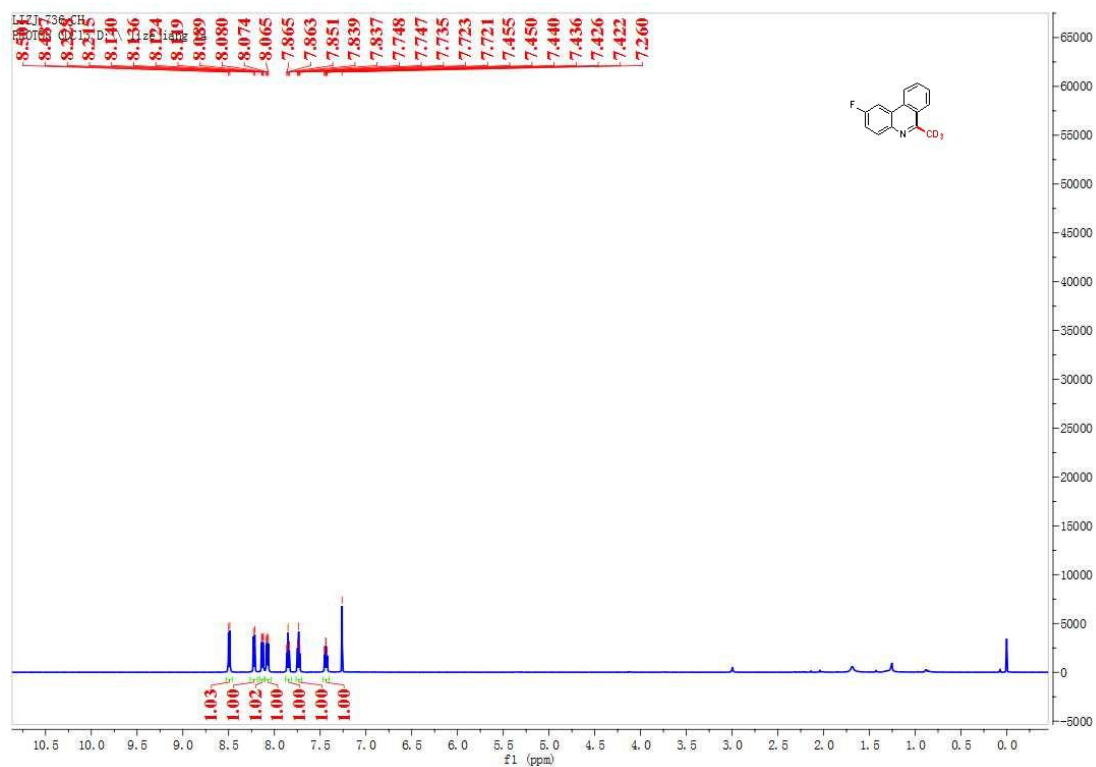

## 22-<sup>13</sup>C NMR

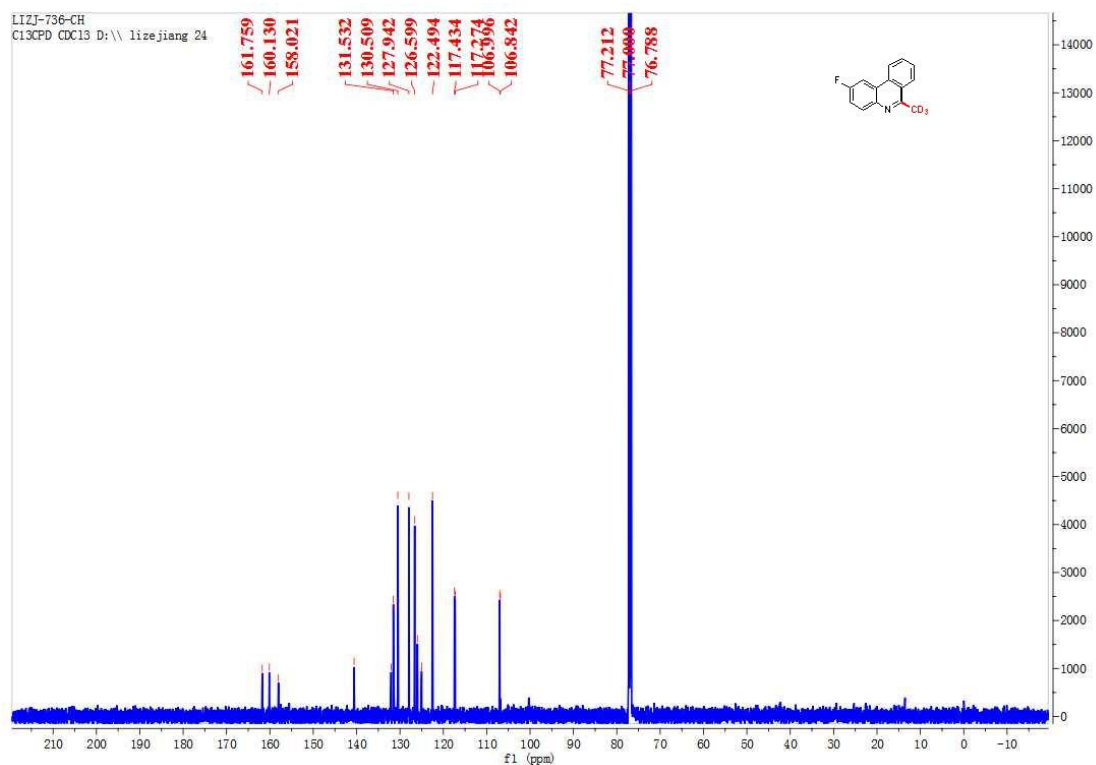

## 23-<sup>1</sup>H NMR

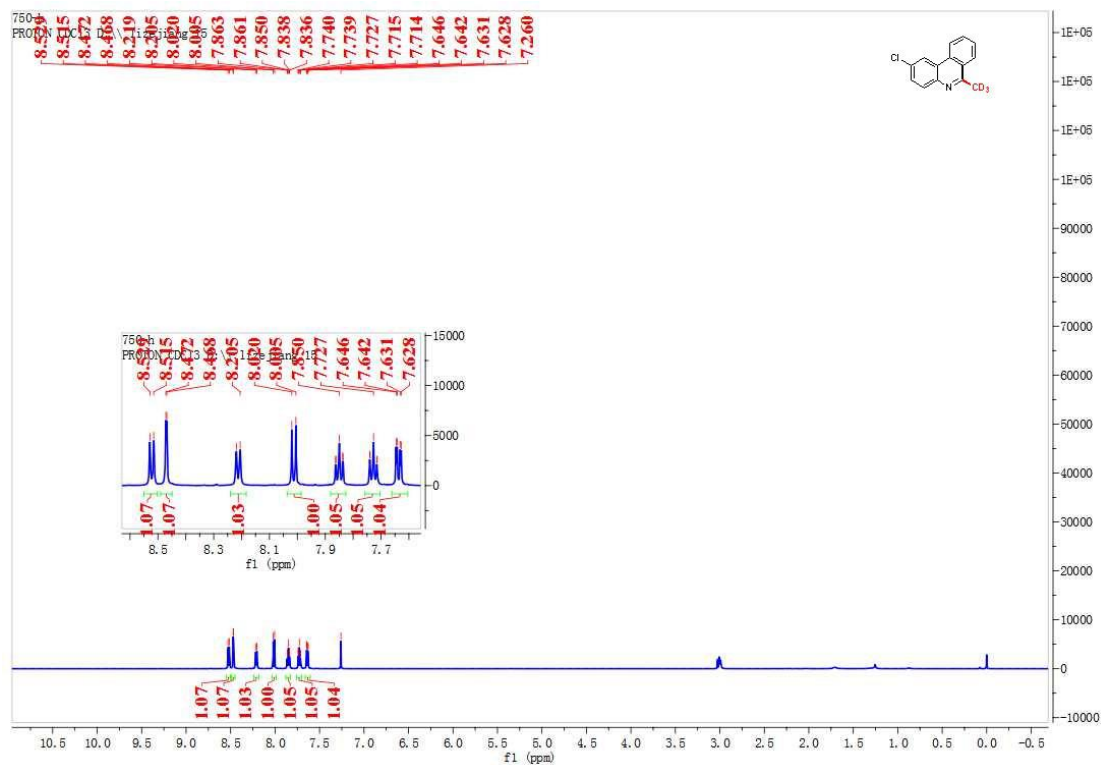

## 23-<sup>13</sup>C NMR

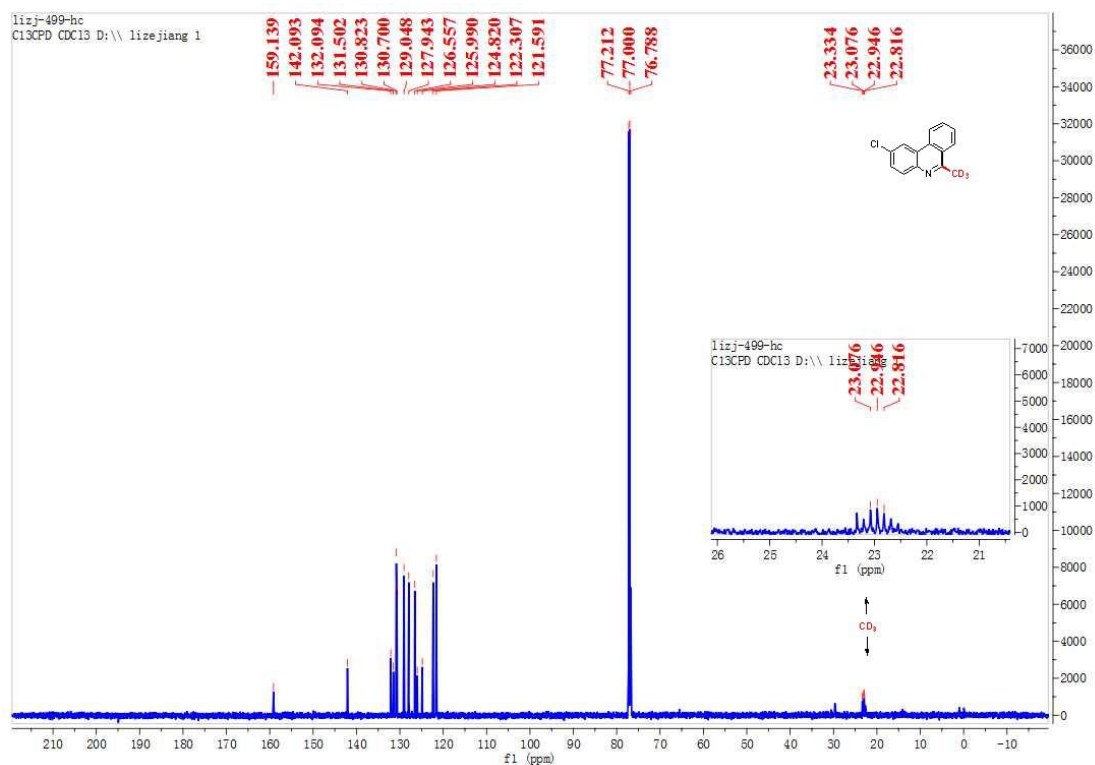

## 24-<sup>1</sup>H NMR

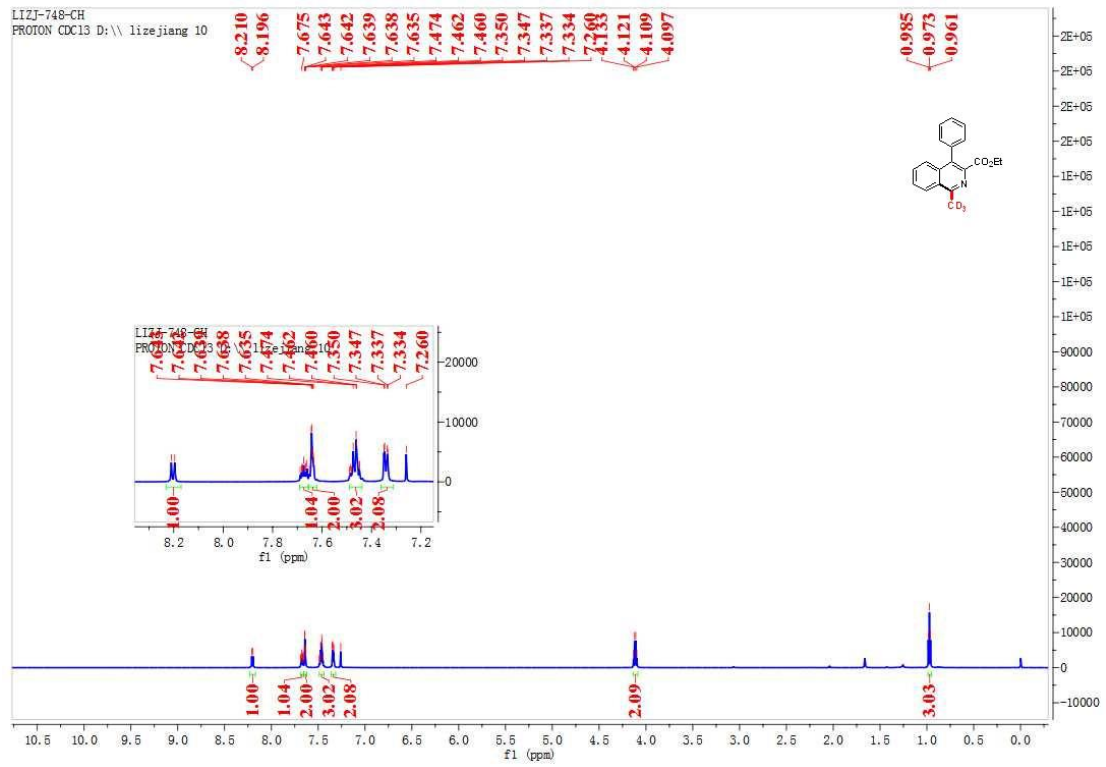

## 24-<sup>13</sup>C NMR

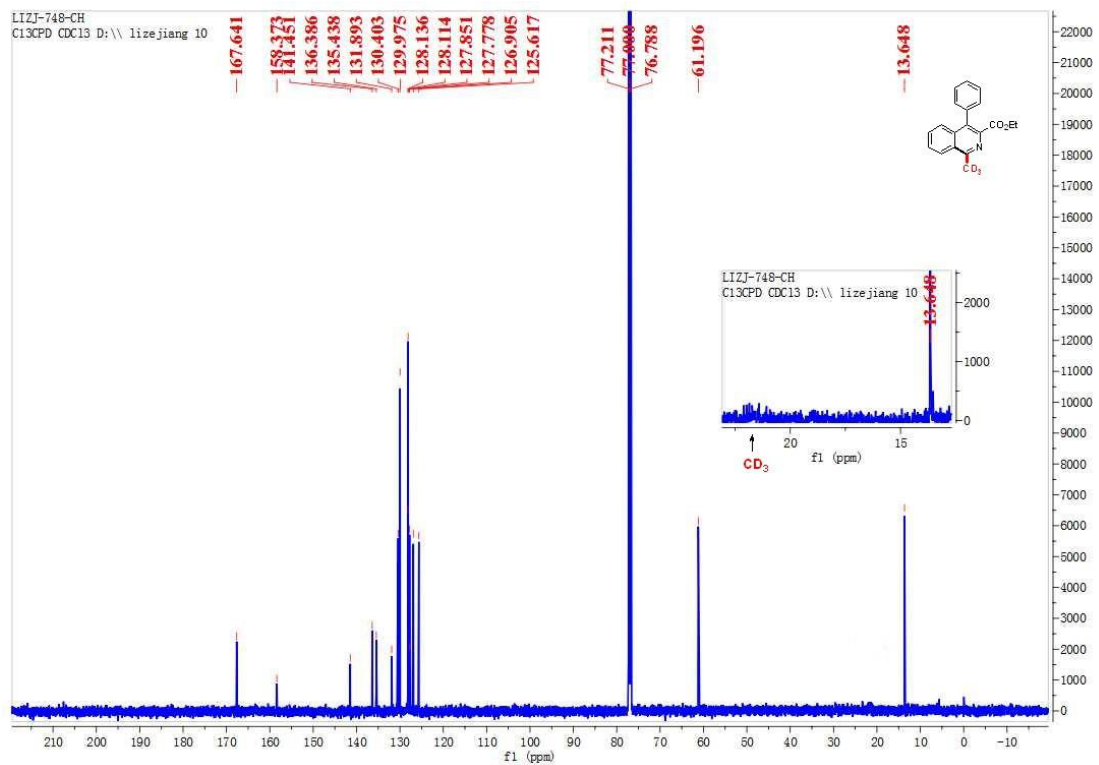

## 25-<sup>1</sup>H NMR

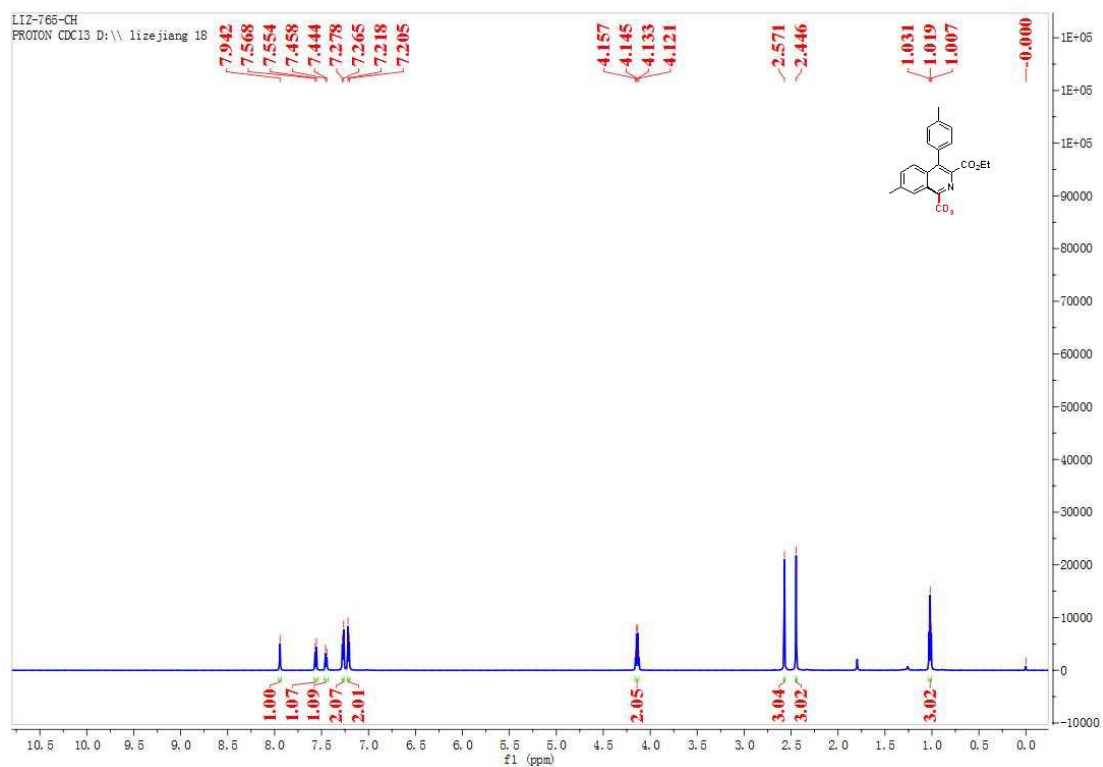

## 25-<sup>13</sup>C NMR

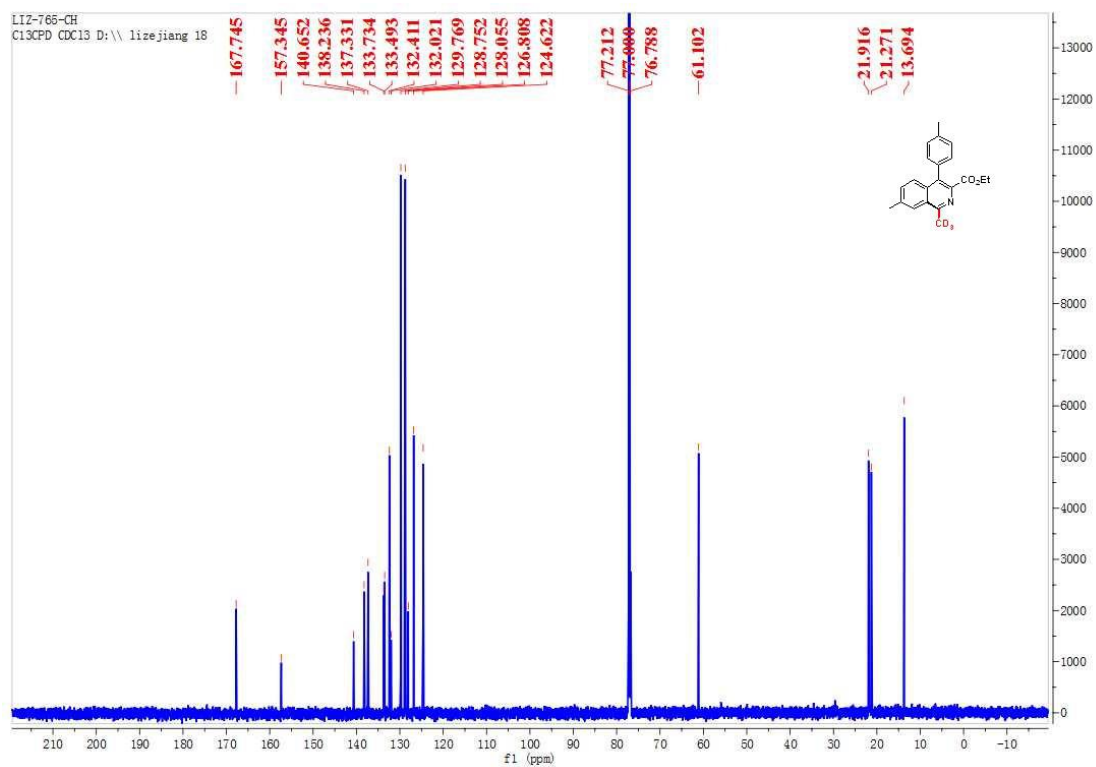

## 26-<sup>1</sup>H NMR

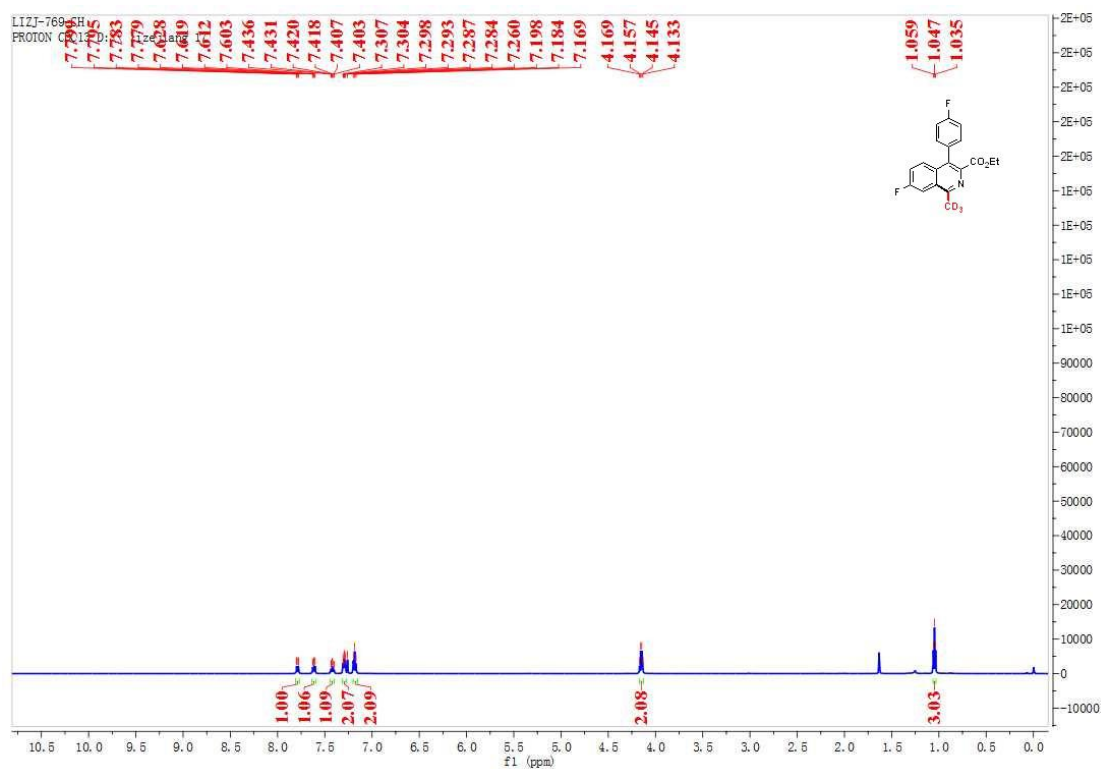

## 26-<sup>13</sup>C NMR

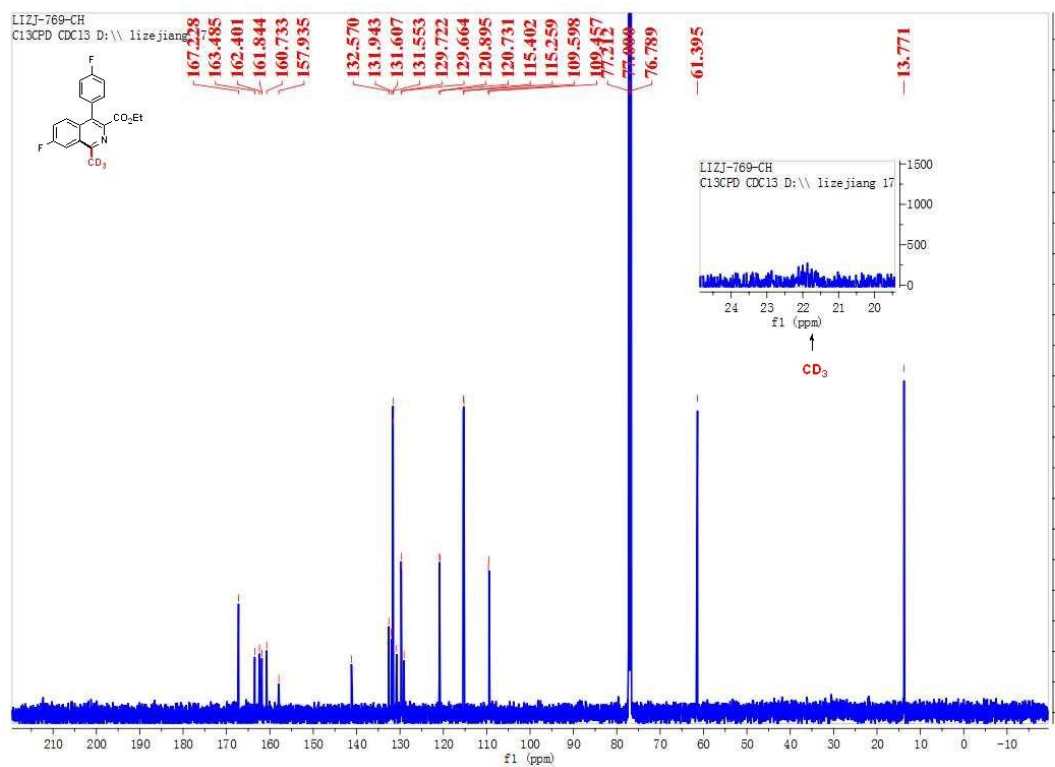

## 27-<sup>1</sup>H NMR

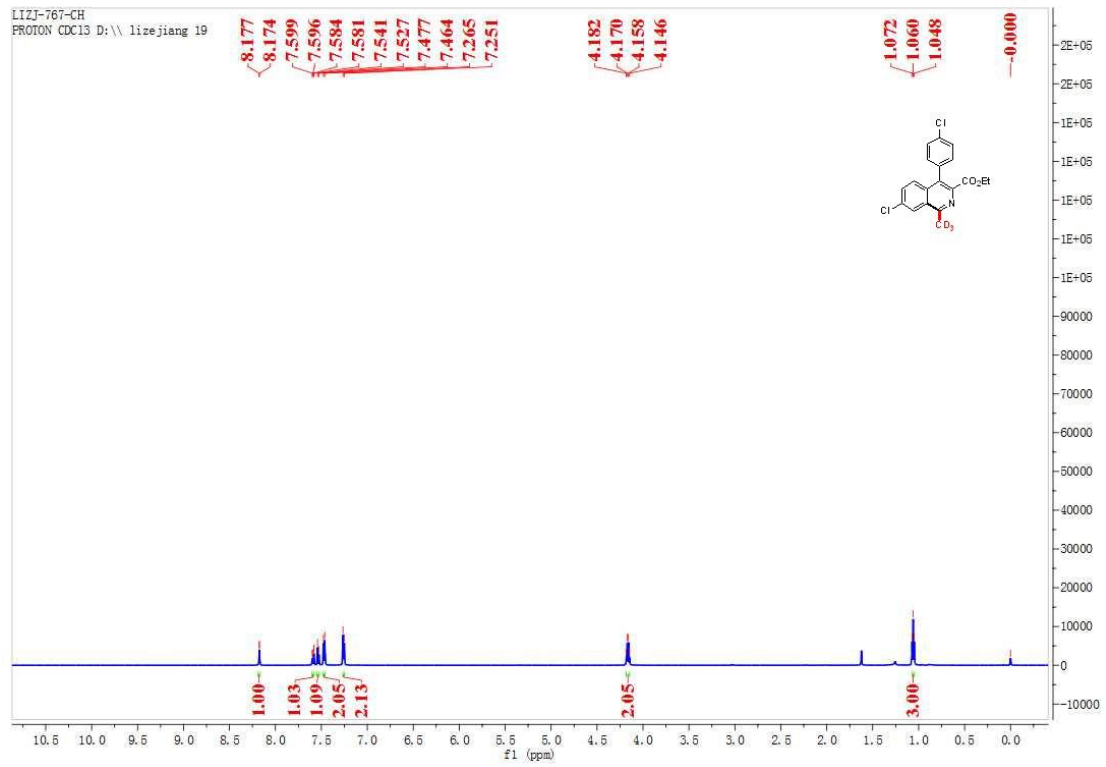

## 27-<sup>13</sup>C NMR

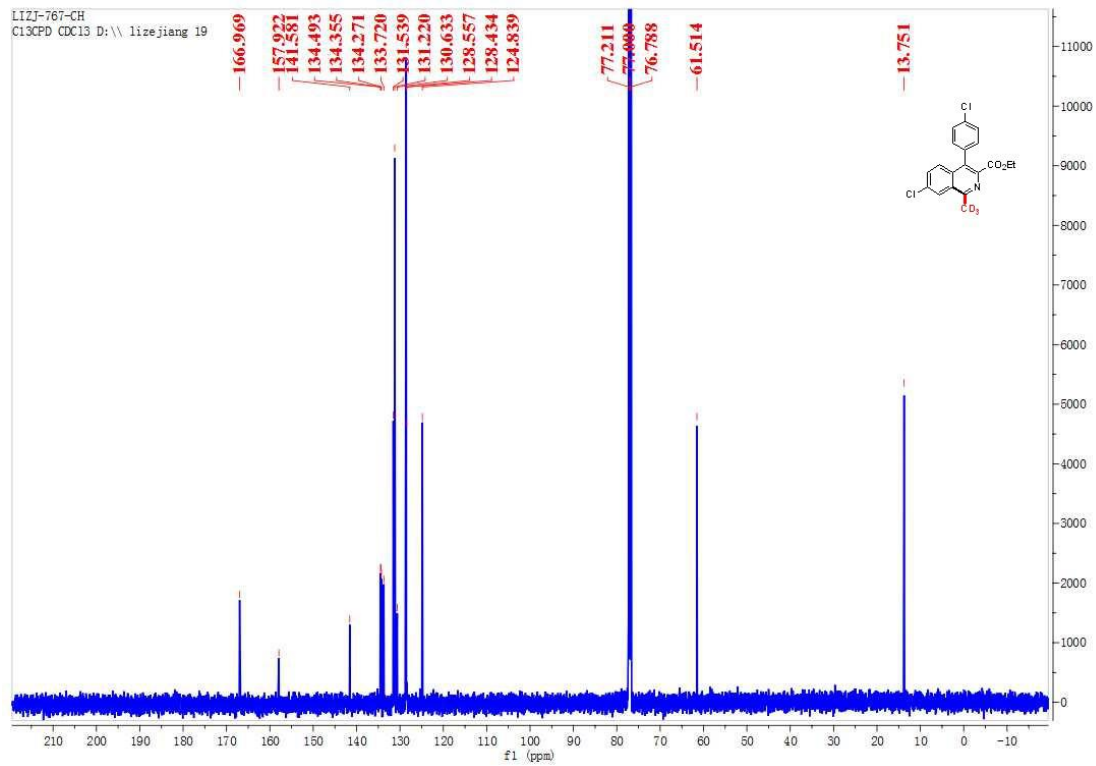

Supplement: c7ra08484f1.pdf [file c7ra08484f1.pdf]
